# Supplementary material for: Whole genome screen reveals a novel relationship between Wolbachia levels and Drosophila host translation
Source: PLoS Pathog. 2018 Nov 13;14(11):e1007445. doi: 10.1371/journal.ppat.1007445 (PMC6258568; doi:10.1371/journal.ppat.1007445)
Supplement: S2 Table — (XLSX) [file ppat.1007445.s018.xlsx]

## Sheet: Sheet1
S2 Table. List of all dsRNA amplicons that target multiple genes in whole genome screen library
Note: These amplicons were excluded from our analysis
dsRNA amplicon	Flybase IDs	Genes
DRSC40836	FBgn0020238 FBgn0004907	14-3-3epsilon 14-3-3zeta
DRSC37848	FBgn0267497 FBgn0267505 FBgn0267504 FBgn0267507 FBgn0085825	28SrRNA:CR45837 pre-rRNA:CR45845 28SrRNA:CR45844 pre-rRNA:CR45847 CR41619
DRSC22968	FBgn0261504 FBgn0000003	7SLRNA:CR42652 7SLRNA:CR32864
DRSC07276	FBgn0033749 FBgn0033748	achi vis
DRSC01854	FBgn0014454 FBgn0260479	Acp1 CG31904
DRSC23472	FBgn0000044 FBgn0065059	Act57B snoRNA:660
DRSC28646	FBgn0051866 FBgn0051865	Ada1-2 Ada1-1
DRSC01220	FBgn0051866 FBgn0051865	Ada1-2 Ada1-1
DRSC01222	FBgn0051866 FBgn0051865	Ada1-2 Ada1-1
DRSC21598	FBgn0263738 FBgn0263757	Ada2a Rpb4
DRSC01862	FBgn0000055 FBgn0000056	Adh Adhr
DRSC01863	FBgn0000055 FBgn0000056	Adh Adhr
DRSC16556	FBgn0039747 FBgn0267751	AdoR CR46082
DRSC28071	FBgn0039747 FBgn0267751	AdoR CR46082
DRSC24008	FBgn0013746 FBgn0032086	alien CG17906
DRSC06281	FBgn0259170 FBgn0025391 FBgn0033744 FBgn0036681 FBgn0052512 FBgn0010352 FBgn0266227 FBgn0266631 FBgn0267130	alpha-Man-Ia Scgdelta Dh44-R2 Obp73a CG32512 Nc73EF CR44922 CR45138 CR45570
DRSC29788	FBgn0250791 FBgn0264467	alphaSnap CR43875
DRSC11285	FBgn0250791 FBgn0264467	alphaSnap CR43875
DRSC20306	FBgn0086782 FBgn0052529	amn Hers
DRSC00317	FBgn0025686 FBgn0267996	Amnionless CR46263
DRSC24129	FBgn0000079 FBgn0000078	Amy-p Amy-d
DRSC05919	FBgn0000079 FBgn0000078	Amy-p Amy-d
DRSC06786	FBgn0000079 FBgn0000078	Amy-p Amy-d
DRSC21242	FBgn0000079 FBgn0000078	Amy-p Amy-d
DRSC21361	FBgn0030089 FBgn0004607	AP-1gamma zfh2
DRSC41453	FBgn0051713 FBgn0266359	Apf CR45007
DRSC40683	FBgn0010217 FBgn0036568 FBgn0262971	ATPsynbeta ATPsynbetaL CR43282
DRSC27023	FBgn0028342 FBgn0030186	ATPsyndelta CG2962
DRSC18247	FBgn0028342 FBgn0030186	ATPsyndelta CG2962
DRSC17191	FBgn0035032 FBgn0083990	ATPsynF sphinx
DRSC15556	FBgn0067782 FBgn0067783	att-ORFB att-ORFA
DRSC27311	FBgn0012042 FBgn0041581	AttA AttB
DRSC06734	FBgn0041581 FBgn0012042	AttB AttA
DRSC12123	FBgn0019637 FBgn0267810	Atu CR46135
DRSC19333	FBgn0000152 FBgn0261245	Axs sing
DRSC03160	FBgn0261683 FBgn0261697	B9d2 tectonic
DRSC20575	FBgn0024251 FBgn0024182	bbx waw
DRSC24894	FBgn0024251 FBgn0024182	bbx waw
DRSC20589	FBgn0024251 FBgn0024182	bbx waw
DRSC10388	FBgn0260859 FBgn0040305 FBgn0267532	Bet3 MTF-1 CR45872
DRSC41533	FBgn0030563 FBgn0052601 FBgn0052598 FBgn0030538	betaNACtes2 betaNACtes3 betaNACtes6 betaNACtes1
DRSC26649	FBgn0030563 FBgn0030566 FBgn0052601 FBgn0052598	betaNACtes2 betaNACtes4 betaNACtes3 betaNACtes6
DRSC27147	FBgn0052601 FBgn0052598	betaNACtes3 betaNACtes6
DRSC20183	FBgn0052601 FBgn0052598 FBgn0030563	betaNACtes3 betaNACtes6 betaNACtes2
DRSC22925	FBgn0052601 FBgn0052598 FBgn0030563	betaNACtes3 betaNACtes6 betaNACtes2
DRSC19801	FBgn0052601 FBgn0052598 FBgn0030566 FBgn0030563	betaNACtes3 betaNACtes6 betaNACtes4 betaNACtes2
DRSC19792	FBgn0052601 FBgn0052598 FBgn0030566 FBgn0030563	betaNACtes3 betaNACtes6 betaNACtes4 betaNACtes2
DRSC24888	FBgn0000180 FBgn0040965	bib CR13130
DRSC02005	FBgn0000182 FBgn0266459	BicC CG45084
DRSC29676	FBgn0000182 FBgn0266459	BicC CG45084
DRSC18660	FBgn0001090 FBgn0036039 FBgn0019644 FBgn0026084	bnb Naa60 ATPsynB cib
DRSC09889	FBgn0040487 FBgn0040809	BobA CG13465
DRSC41502	FBgn0040487 FBgn0040809	BobA CG13465
DRSC10011	FBgn0040487 FBgn0040809	BobA CG13465
DRSC02747	FBgn0263108 FBgn0004875 FBgn0040984	BtbVII enc CG4440
DRSC02009	FBgn0027844 FBgn0028658	CAH1 Adat1
DRSC29057	FBgn0013759 FBgn0266181	CASK CRG
DRSC38942	FBgn0000261 FBgn0032061	Cat CG9314
DRSC25114	FBgn0004783 FBgn0004782	Ccp84Aa Ccp84Ab
DRSC12587	FBgn0004783 FBgn0004782	Ccp84Aa Ccp84Ab
DRSC12586	FBgn0004783 FBgn0004782 FBgn0004780	Ccp84Aa Ccp84Ab Ccp84Ad
DRSC38956	FBgn0004779 FBgn0004783 FBgn0004782 FBgn0004780 FBgn0004777	Ccp84Ae Ccp84Aa Ccp84Ab Ccp84Ad Ccp84Ag
DRSC23052	FBgn0032863 FBgn0051687	Cdc23 CG31687
DRSC02708	FBgn0032863 FBgn0051687	Cdc23 CG31687
DRSC08687	FBgn0265574 FBgn0040291	Cdc5 Roc1b
DRSC26879	FBgn0265574 FBgn0040291	Cdc5 Roc1b
DRSC41555	FBgn0013762 FBgn0004106	Cdk5 Cdk1
DRSC27090	FBgn0010350 FBgn0035842	CdsA CG7504
DRSC16603	FBgn0000277 FBgn0000276	CecA2 CecA1
DRSC16604	FBgn0000277 FBgn0000276	CecA2 CecA1
DRSC05992	FBgn0034443 FBgn0267587	cer CR45925
DRSC29926	FBgn0030121 FBgn0030120	Cfp1 CG17440
DRSC26806	FBgn0037492 FBgn0011282	CG10050 Obp84a
DRSC12603	FBgn0037492 FBgn0011282	CG10050 Obp84a
DRSC09690	FBgn0035722 FBgn0035721	CG10075 CG9948
DRSC24285	FBgn0034644 FBgn0264327	CG10082 CR43786
DRSC14190	FBgn0038033 FBgn0038032	CG10097 CG10096
DRSC14189	FBgn0038033 FBgn0038032	CG10097 CG10096
DRSC39073	FBgn0039085 FBgn0039086 FBgn0039087	CG10170 CG16732 CG10168
DRSC04064	FBgn0260455 FBgn0067903	CG10332 IM18
DRSC28645	FBgn0035679 FBgn0035678	CG10467 CG10469
DRSC05994	FBgn0034426 FBgn0034428	CG10476 CG18606
DRSC27160	FBgn0034583 FBgn0265915	CG10527 CR44704
DRSC04078	FBgn0034583 FBgn0265915	CG10527 CR44704
DRSC28566	FBgn0040992 FBgn0260228	CG10570 CG42502
DRSC02071	FBgn0040992 FBgn0260228	CG10570 CG42502
DRSC11625	FBgn0037044 FBgn0267451	CG10585 CR45801
DRSC41597	FBgn0035619 FBgn0033423 FBgn0266819	CG10592 CG1809 CR45281
DRSC09775	FBgn0035592 FBgn0266653	CG10674 CR45160
DRSC12143	FBgn0037250 FBgn0267813	CG1074 CR46138
DRSC29045	FBgn0037250 FBgn0267813	CG1074 CR46138
DRSC27640	FBgn0031398 FBgn0085203	CG10880 CG34174
DRSC14281	FBgn0037543 FBgn0037544	CG10903 CG11035
DRSC29512	FBgn0030073 FBgn0264384	CG10962 CR43836
DRSC17772	FBgn0030078 FBgn0267098	CG10970 CR45538
DRSC17198	FBgn0039930 FBgn0264823	CG11077 CR44031
DRSC27065	FBgn0046222 FBgn0267809	CG1109 CR46134
DRSC06428	FBgn0034485 FBgn0034486	CG11099 CG13869
DRSC11633	FBgn0037200 FBgn0267630	CG11109 CR45968
DRSC06608	FBgn0033174 FBgn0050502	CG11125 fa2h
DRSC28126	FBgn0037070 FBgn0266981	CG11309 CR45432
DRSC39010	FBgn0031856 FBgn0024991	CG11322 CG2694
DRSC08181	FBgn0035552 FBgn0035582	CG11350 CG13705
DRSC25240	FBgn0035552 FBgn0052603 FBgn0004780	CG11350 CG32603 Ccp84Ad
DRSC26158	FBgn0035022 FBgn0035021	CG11413 CG4622
DRSC04109	FBgn0035022 FBgn0035021	CG11413 CG4622
DRSC09840	FBgn0046296 FBgn0267552	CG11534 CR45892
DRSC19408	FBgn0030541 FBgn0267657	CG11584 CR45995
DRSC25623	FBgn0030541 FBgn0267657	CG11584 CR45995
DRSC41509	FBgn0038067 FBgn0042207 FBgn0267682	CG11598 CG18530 CR46018
DRSC14339	FBgn0038731 FBgn0038730	CG11659 CG6300
DRSC12357	FBgn0264712 FBgn0037322	CG1172 Or83a
DRSC14375	FBgn0037615 FBgn0037614	CG11760 CG8116
DRSC38826	FBgn0037625 FBgn0083971	CG11768 CG34135
DRSC27430	FBgn0037625 FBgn0083971 FBgn0037624	CG11768 CG34135 CG8223
DRSC23219	FBgn0037625 FBgn0083971 FBgn0265159	CG11768 CG34135 CR44228
DRSC14401	FBgn0039630 FBgn0267776	CG11843 CR46107
DRSC25728	FBgn0039309 FBgn0039308	CG11891 CG11889
DRSC14426	FBgn0039309 FBgn0039308	CG11891 CG11889
DRSC14427	FBgn0039309 FBgn0039308	CG11891 CG11889
DRSC24434	FBgn0030457 FBgn0085440	CG12096 Lgr4
DRSC19884	FBgn0030457 FBgn0085440	CG12096 Lgr4
DRSC06446	FBgn0033473 FBgn0033474	CG12128 CG1407
DRSC28605	FBgn0028504 FBgn0062517	CG12182 CG16984
DRSC08500	FBgn0028504 FBgn0062517	CG12182 CG16984
DRSC27416	FBgn0025387 FBgn0025388	CG12184 CG12179
DRSC18559	FBgn0025387 FBgn0025388	CG12184 CG12179
DRSC29176	FBgn0038002 FBgn0263454	CG12256 CR43477
DRSC14484	FBgn0038002 FBgn0263454	CG12256 CR43477
DRSC09871	FBgn0035811 FBgn0035812	CG12262 CG7457
DRSC15356	FBgn0038590 FBgn0038589	CG12320 CG18598
DRSC22814	FBgn0037797 FBgn0037798	CG12420 CG12817
DRSC04123	FBgn0034782 FBgn0050265 FBgn0034783	CG12490 CG30265 CG9825
DRSC25712	FBgn0034782 FBgn0050265 FBgn0034783	CG12490 CG30265 CG9825
DRSC26465	FBgn0034900 FBgn0083941	CG12491 CG34105
DRSC29810	FBgn0036872 FBgn0052214	CG12519 CG32214
DRSC11676	FBgn0037178 FBgn0037180	CG12546 CG14452
DRSC23549	FBgn0030666 FBgn0030665	CG12708 CG15646
DRSC19492	FBgn0030443 FBgn0266114	CG12715 CR44840
DRSC41534	FBgn0029825 FBgn0052756	CG12728 CG32756
DRSC20292	FBgn0031041 FBgn0027358	CG12788 Tim9b
DRSC19504	FBgn0031041 FBgn0027358	CG12788 Tim9b
DRSC28671	FBgn0031041 FBgn0027358	CG12788 Tim9b
DRSC06201	FBgn0033954 FBgn0033953	CG12860 CG12861
DRSC06217	FBgn0033512 FBgn0263271	CG12902 CG43397
DRSC07025	FBgn0033547 FBgn0033548	CG12935 CG7637
DRSC09911	FBgn0036655 FBgn0036656	CG13031 CG13026
DRSC09920	FBgn0036609 FBgn0036608	CG13039 CG13040
DRSC09922	FBgn0036605 FBgn0036606 FBgn0267223	CG13041 CG13060 CR45663
DRSC26793	FBgn0036605 FBgn0267223	CG13041 CR45663
DRSC09925	FBgn0036599 FBgn0267550	CG13044 CR45890
DRSC28609	FBgn0036599 FBgn0267550	CG13044 CR45890
DRSC09943	FBgn0036606 FBgn0036605 FBgn0267223	CG13060 CG13041 CR45663
DRSC28110	FBgn0036606 FBgn0267224	CG13060 CR45664
DRSC24693	FBgn0036577 FBgn0264483	CG13073 CR43891
DRSC19272	FBgn0032050 FBgn0264600 FBgn0030493 FBgn0267660 FBgn0011785 FBgn0051806 FBgn0260450 FBgn0031428 FBgn0003984 FBgn0033741 FBgn0263132	CG13096 CR43949 CG15756 CR45998 BRWD3 CG31806 CalpC CG9886 vn CG8545 Cht6
DRSC03266	FBgn0032088 FBgn0032089	CG13102 Rcd-1r
DRSC09985	FBgn0035949 FBgn0263199	CG13314 Galk
DRSC29000	FBgn0033789 FBgn0033788	CG13324 CG13323
DRSC06707	FBgn0034518 FBgn0034519	CG13430 CG18065
DRSC06392	FBgn0034518 FBgn0034519	CG13430 CG18065
DRSC10036	FBgn0035859 FBgn0035856	CG13678 CG13679
DRSC22749	FBgn0035856 FBgn0035859	CG13679 CG13678
DRSC02299	FBgn0031937 FBgn0267743	CG13795 CR46074
DRSC22161	FBgn0031939 FBgn0260479	CG13796 CG31904
DRSC24218	FBgn0034486 FBgn0034485	CG13869 CG11099
DRSC08347	FBgn0035112 FBgn0035113	CG13877 pyx
DRSC08370	FBgn0035162 FBgn0266694	CG13900 CR45184
DRSC08402	FBgn0035270 FBgn0265451	CG13933 CR44351
DRSC02339	FBgn0031731 FBgn0266065	CG14007 CR44818
DRSC02367	FBgn0260451 FBgn0260470	CG14042 SP555
DRSC03428	FBgn0260451 FBgn0260470	CG14042 SP555
DRSC10081	FBgn0036830 FBgn0036829	CG14077 Ir75d
DRSC38737	FBgn0036906 FBgn0260874	CG14102 Ir76a
DRSC05695	FBgn0031023 FBgn0263772 FBgn0020378 FBgn0083981 FBgn0041210 FBgn0035287 FBgn0264502 FBgn0031903 FBgn0085376 FBgn0020307 FBgn0000542 FBgn0027788 FBgn0263392 FBgn0029822 FBgn0004647 FBgn0033602 FBgn0265523 FBgn0259680 FBgn0030886 FBgn0003499 FBgn0033497 FBgn0040737 FBgn0260658 FBgn0051475 FBgn0259211 FBgn0014859 FBgn0011676 FBgn0041092 FBgn0034606 FBgn0031698 FBgn0024189 FBgn0040765 FBgn0262735 FBg…	CG14200 CG43689 Sp1 RunxA HDAC4 CG13937 CG43901 Wnt10 CG34347 dve ec Hey Tet CG12236 N Cpr47Ee Smr Pkcdelta CG12672 sr CG12912 Tango8 CG42541 CG31475 grh Hr38 Nos tai ASPP Ncoa6 sns luna Imp Rdh sty rut CG42389 dy Gld2 CG5079 ctrip X11Lbeta rn Neto retn Hr4 Cdk8 Vsx1
DRSC19566	FBgn0031040 FBgn0031041 FBgn0027358	CG14210 CG12788 Tim9b
DRSC29021	FBgn0031040 FBgn0031041 FBgn0027358	CG14210 CG12788 Tim9b
DRSC29188	FBgn0031062 FBgn0031061	CG14230 CG14232
DRSC14794	FBgn0038568 FBgn0266565	CG14315 CR45104
DRSC26405	FBgn0038148 FBgn0040553	CG14377 CG14374
DRSC26342	FBgn0038148 FBgn0040553	CG14377 CG14374
DRSC14843	FBgn0038097 FBgn0040493	CG14384 grsm
DRSC23288	FBgn0029893 FBgn0000542 FBgn0030121	CG14442 ec Cfp1
DRSC11708	FBgn0037183 FBgn0016034	CG14451 mael
DRSC26512	FBgn0037183 FBgn0016034	CG14451 mael
DRSC29979	FBgn0037180 FBgn0037178	CG14452 CG12546
DRSC11709	FBgn0037180 FBgn0037178	CG14452 CG12546
DRSC11711	FBgn0037177 FBgn0052453	CG14454 CG32453
DRSC12653	FBgn0037535 FBgn0266598	CG14463 Kmn2
DRSC14856	FBgn0037535 FBgn0266598	CG14463 Kmn2
DRSC27641	FBgn0034281 FBgn0003701	CG14490 thr
DRSC06471	FBgn0034317 FBgn0034318	CG14499 CG14500
DRSC06470	FBgn0034317 FBgn0034318	CG14499 CG14500
DRSC41519	FBgn0034318 FBgn0034317	CG14500 CG14499
DRSC14893	FBgn0039405 FBgn0260224	CG14550 CG42498
DRSC13742	FBgn0039405 FBgn0260224	CG14550 CG42498
DRSC18166	FBgn0014903 FBgn0053082	CG14630 CG33082
DRSC18653	FBgn0014903 FBgn0053082	CG14630 CG33082
DRSC12231	FBgn0040687 FBgn0037236	CG14645 Skp2
DRSC23982	FBgn0037922 FBgn0037921	CG14711 CG6808
DRSC14934	FBgn0037922 FBgn0037921	CG14711 CG6808
DRSC25199	FBgn0029590 FBgn0029589	CG14811 CG14810
DRSC08865	FBgn0035734 FBgn0052391	CG14823 CG32391
DRSC39068	FBgn0038260 FBgn0038261	CG14855 CG14856
DRSC02412	FBgn0032365 FBgn0032366	CG14929 CG14930
DRSC02415	FBgn0040968 FBgn0259989	CG14933 CG42486
DRSC26454	FBgn0040968 FBgn0259989	CG14933 CG42486
DRSC23022	FBgn0035477 FBgn0024183	CG14982 vig
DRSC24576	FBgn0034390 FBgn0264679	CG15093 CR43964
DRSC06522	FBgn0034390 FBgn0264679	CG15093 CR43964
DRSC23025	FBgn0033108 FBgn0263517	CG15236 mir-4976
DRSC24727	FBgn0040718 FBgn0267276	CG15353 CR45712
DRSC00383	FBgn0040718 FBgn0267276	CG15353 CR45712
DRSC13536	FBgn0030077 FBgn0051475	CG15365 CG31475
DRSC30077	FBgn0040715 FBgn0259717	CG15386 CG42371
DRSC00400	FBgn0040715 FBgn0259717	CG15386 CG42371
DRSC00404	FBgn0031419 FBgn0266317	CG15390 CR44982
DRSC00432	FBgn0031554 FBgn0015663	CG15418 Dot
DRSC20521	FBgn0031146 FBgn0031145	CG15449 Ntf-2
DRSC15065	FBgn0039742 FBgn0264838	CG15528 CR44046
DRSC19981	FBgn0030642 FBgn0030641 FBgn0030640	CG15642 CG6299 CG6294
DRSC04264	FBgn0034642 FBgn0260720	CG15674 CR42547
DRSC26960	FBgn0030451 FBgn0030452	CG15717 MFS10
DRSC19684	FBgn0030451 FBgn0030452	CG15717 MFS10
DRSC19888	FBgn0030451 FBgn0030452	CG15717 MFS10
DRSC24220	FBgn0030338 FBgn0264509	CG15741 CR43908
DRSC19707	FBgn0030338 FBgn0264509	CG15741 CR43908
DRSC29131	FBgn0029809 FBgn0263545	CG15767 mir-4963
DRSC18078	FBgn0029799 FBgn0029800	CG15772 lin-52
DRSC00830	FBgn0031292 FBgn0002936	CG15824 ninaA
DRSC00474	FBgn0031283 FBgn0031282	CG15880 Pex12
DRSC10105	FBgn0036909 FBgn0083952	CG15881 CG34116
DRSC18096	FBgn0029858 FBgn0029859	CG15896 CG15892
DRSC04977	FBgn0033090 FBgn0265050	CG15909 CR44165
DRSC25487	FBgn0039854 FBgn0266700	CG1635 CR45190
DRSC15131	FBgn0039854 FBgn0266700	CG1635 CR45190
DRSC02541	FBgn0032533 FBgn0028919	CG16888 CG16865
DRSC39032	FBgn0034480 FBgn0053301	CG16898 CG33301
DRSC10235	FBgn0035795 FBgn0028582	CG16998 lqf
DRSC26666	FBgn0040754 FBgn0043010	CG17059 Fsn
DRSC26637	FBgn0039051 FBgn0039052	CG17109 CG6733
DRSC28130	FBgn0039050 FBgn0039049	CG17110 CG6726
DRSC16101	FBgn0039050 FBgn0039049	CG17110 CG6726
DRSC15173	FBgn0039050 FBgn0039049	CG17110 CG6726
DRSC02585	FBgn0260454 FBgn0260453	CG17139 CG17140
DRSC02586	FBgn0260454 FBgn0260453	CG17139 CG17140
DRSC20900	FBgn0039944 FBgn0039945	CG17162 CG17159
DRSC20899	FBgn0039944 FBgn0039945	CG17162 CG17159
DRSC15191	FBgn0039366 FBgn0039367	CG17198 CG17197
DRSC41319	FBgn0039366 FBgn0039367	CG17198 CG17197
DRSC15190	FBgn0039366 FBgn0039367	CG17198 CG17197
DRSC41320	FBgn0039366 FBgn0039367 FBgn0039368	CG17198 CG17197 CG17196
DRSC15207	FBgn0038821 FBgn0004107	CG17267 Cdk2
DRSC02602	FBgn0040993 FBgn0259201	CG17325 CG42305
DRSC02606	FBgn0032751 FBgn0032752	CG17343 CG10702
DRSC22807	FBgn0032751 FBgn0032752	CG17343 CG10702
DRSC28706	FBgn0032751 FBgn0032752	CG17343 CG10702
DRSC41285	FBgn0030120 FBgn0030121	CG17440 Cfp1
DRSC11740	FBgn0037004 FBgn0037003	CG17637 CG18281
DRSC00513	FBgn0031356 FBgn0266311	CG17660 CR44976
DRSC06862	FBgn0033802 FBgn0053182	CG17724 Kdm4B
DRSC26702	FBgn0033802 FBgn0053182	CG17724 Kdm4B
DRSC27618	FBgn0033802 FBgn0053182 FBgn0028991	CG17724 Kdm4B seq
DRSC06687	FBgn0033802 FBgn0053182 FBgn0028991	CG17724 Kdm4B seq
DRSC37911	FBgn0033802 FBgn0028991	CG17724 seq
DRSC07992	FBgn0033802 FBgn0028991 FBgn0053182 FBgn0016794	CG17724 seq Kdm4B dos
DRSC24252	FBgn0039374 FBgn0011273	CG17770 Acam
DRSC29529	FBgn0039374 FBgn0011273	CG17770 Acam
DRSC14110	FBgn0039374 FBgn0011273	CG17770 Acam
DRSC15264	FBgn0039374 FBgn0011273	CG17770 Acam
DRSC38964	FBgn0039374 FBgn0011273 FBgn0000253	CG17770 Acam Cam
DRSC24069	FBgn0025635 FBgn0267031	CG17829 CR45475
DRSC02641	FBgn0032086 FBgn0013746	CG17906 alien
DRSC41264	FBgn0032086 FBgn0013746 FBgn0032085	CG17906 alien CG9555
DRSC10294	FBgn0036537 FBgn0036538	CG18081 CG15715
DRSC10216	FBgn0036537 FBgn0036538	CG18081 CG15715
DRSC06710	FBgn0033423 FBgn0266819	CG1809 CR45281
DRSC22509	FBgn0034330 FBgn0034331	CG18107 CG15067
DRSC25528	FBgn0036023 FBgn0036024	CG18179 CG18180
DRSC41288	FBgn0036023 FBgn0036024	CG18179 CG18180
DRSC13319	FBgn0038653 FBgn0261618	CG18208 larp
DRSC10307	FBgn0036795 FBgn0036796	CG18233 CG18231
DRSC41303	FBgn0030956 FBgn0030959	CG18259 CG6961
DRSC22210	FBgn0036873 FBgn0036871 FBgn0036872 FBgn0267714 FBgn0052213 FBgn0052214 FBgn0052208	CG18294 CG14096 CG12519 CR46047 CG32213 CG32214 825-Oak
DRSC09891	FBgn0036873 FBgn0267714	CG18294 CR46047
DRSC26600	FBgn0033905 FBgn0265499	CG18324 CR44368
DRSC06721	FBgn0033905 FBgn0265499	CG18324 CR44368
DRSC01958	FBgn0028517 FBgn0051827	CG18478 CG31827
DRSC28983	FBgn0042182 FBgn0064126	CG18749 CG33722
DRSC15386	FBgn0042182 FBgn0064126	CG18749 CG33722
DRSC12674	FBgn0042182 FBgn0064126	CG18749 CG33722
DRSC24994	FBgn0042125 FBgn0042127	CG18787 CG18789
DRSC02696	FBgn0042127 FBgn0042125	CG18789 CG18787
DRSC06795	FBgn0042173 FBgn0033229	CG18853 CG12822
DRSC20757	FBgn0042173 FBgn0033229	CG18853 CG12822
DRSC27486	FBgn0042173 FBgn0003082	CG18853 phr
DRSC02703	FBgn0042175 FBgn0051683	CG18858 CG31683
DRSC26788	FBgn0042175 FBgn0051683	CG18858 CG31683
DRSC17979	FBgn0030164 FBgn0263216	CG1889 CG43386
DRSC21389	FBgn0037383 FBgn0033302	CG2023 Cyp6a14
DRSC03722	FBgn0032957 FBgn0267735	CG2225 CR46066
DRSC25579	FBgn0030407 FBgn0267181	CG2543 CR45621
DRSC19857	FBgn0030407 FBgn0267181	CG2543 CR45621
DRSC38664	FBgn0028491 FBgn0265575	CG2930 yin
DRSC38931	FBgn0031472 FBgn0032078	CG2983 C1GalTA
DRSC22908	FBgn0050033 FBgn0015582	CG30033 dare
DRSC05344	FBgn0050051 FBgn0033738	CG30051 DUBAI
DRSC05418	FBgn0260475 FBgn0033836	CG30059 CG18278
DRSC05674	FBgn0050108 FBgn0050109	CG30108 CG30109
DRSC05726	FBgn0050120 FBgn0034350	CG30120 CG5189
DRSC06922	FBgn0050120 FBgn0034350	CG30120 CG5189
DRSC06791	FBgn0050160 FBgn0042086	CG30160 Tsp42Eb
DRSC04961	FBgn0050160 FBgn0042086	CG30160 Tsp42Eb
DRSC04158	FBgn0050269 FBgn0050273	CG30269 CG30273
DRSC25520	FBgn0050269 FBgn0050273	CG30269 CG30273
DRSC22059	FBgn0050269 FBgn0050273	CG30269 CG30273
DRSC04170	FBgn0050271 FBgn0259179	CG30271 CG42284
DRSC22660	FBgn0050441 FBgn0033019	CG30441 CG10395
DRSC28635	FBgn0050457 FBgn0050458	CG30457 CG30458
DRSC28843	FBgn0050479 FBgn0050480	CG30479 CG30480
DRSC06735	FBgn0050479 FBgn0050480	CG30479 CG30480
DRSC28831	FBgn0050479 FBgn0050480	CG30479 CG30480
DRSC06736	FBgn0050479 FBgn0050480	CG30479 CG30480
DRSC06557	FBgn0050497 FBgn0266526	CG30497 CG45093
DRSC25794	FBgn0050497 FBgn0266526	CG30497 CG45093
DRSC07636	FBgn0050503 FBgn0040513	CG30503 kappaB-Ras
DRSC25537	FBgn0050503 FBgn0040513	CG30503 kappaB-Ras
DRSC18572	FBgn0025613 FBgn0025612	CG3081 CG3062
DRSC24466	FBgn0051086 FBgn0051323	CG31086 CG31323
DRSC14902	FBgn0051086 FBgn0051323	CG31086 CG31323
DRSC15934	FBgn0051089 FBgn0262904	CG31089 CR43259
DRSC13839	FBgn0051131 FBgn0051253	CG31131 CG31253
DRSC25099	FBgn0051161 FBgn0051159	CG31161 EF-G2
DRSC38930	FBgn0031471 FBgn0031470	CG3117 CG18557
DRSC15214	FBgn0051191 FBgn0264915	CG31191 CR44106
DRSC12493	FBgn0051286 FBgn0026565	CG31286 CG1315
DRSC14370	FBgn0051460 FBgn0265318	CG31460 CR44291
DRSC41487	FBgn0051533 FBgn0051327	CG31533 CG31327
DRSC02617	FBgn0051624 FBgn0051988	CG31624 CG31988
DRSC24715	FBgn0031449 FBgn0263564	CG31689 mir-4914
DRSC26400	FBgn0051703 FBgn0051702	CG31703 CG31702
DRSC41325	FBgn0051703 FBgn0051702	CG31703 CG31702
DRSC03687	FBgn0051703 FBgn0051702	CG31703 CG31702
DRSC22118	FBgn0051704 FBgn0264564	CG31704 CR43936
DRSC02909	FBgn0051712 FBgn0266359	CG31712 CR45007
DRSC28836	FBgn0051712 FBgn0266359	CG31712 CR45007
DRSC17271	FBgn0029524 FBgn0052817	CG3176 CG32817
DRSC17282	FBgn0029524 FBgn0052817	CG3176 CG32817
DRSC28432	FBgn0029524 FBgn0052817	CG3176 CG32817
DRSC18288	FBgn0029524 FBgn0052817	CG3176 CG32817
DRSC23266	FBgn0028537 FBgn0260954	CG31775 CG42586
DRSC01955	FBgn0051780 FBgn0028864	CG31780 CG18477
DRSC26122	FBgn0051780 FBgn0028864	CG31780 CG18477
DRSC01561	FBgn0051809 FBgn0051810	CG31809 CG31810
DRSC25411	FBgn0051809 FBgn0051810	CG31809 CG31810
DRSC01560	FBgn0051809 FBgn0051810	CG31809 CG31810
DRSC02650	FBgn0051812 FBgn0032595	CG31812 CG17996
DRSC20756	FBgn0051872 FBgn0043825	CG31872 CG18284
DRSC02572	FBgn0051872 FBgn0043825	CG31872 CG18284
DRSC22180	FBgn0051909 FBgn0264344	CG31909 CG43800
DRSC26278	FBgn0051909 FBgn0264344	CG31909 CG43800
DRSC00946	FBgn0051910 FBgn0086034	CG31910 snoRNA:Me28S-G2743
DRSC02363	FBgn0031668 FBgn0265968	CG31917 Tfb5
DRSC02362	FBgn0031668 FBgn0265968	CG31917 Tfb5
DRSC28677	FBgn0031668 FBgn0265968	CG31917 Tfb5
DRSC26533	FBgn0051922 FBgn0024314	CG31922 Plap
DRSC00580	FBgn0051954 FBgn0266838	CG31954 CR45300
DRSC00323	FBgn0051976 FBgn0051975	CG31976 CG31975
DRSC22146	FBgn0051976 FBgn0051975	CG31976 CG31975
DRSC03879	FBgn0029887 FBgn0023524 FBgn0000524 FBgn0013576 FBgn0031116	CG3198 CG3078 dx mtd CG1695
DRSC09346	FBgn0047178 FBgn0266946	CG32147 CR45397
DRSC39056	FBgn0052152 FBgn0036576	CG32152 CG5151
DRSC23220	FBgn0052152 FBgn0036576	CG32152 CG5151
DRSC22906	FBgn0052152 FBgn0036576	CG32152 CG5151
DRSC29097	FBgn0052152 FBgn0036576	CG32152 CG5151
DRSC09442	FBgn0052163 FBgn0267555	CG32163 CR45895
DRSC28736	FBgn0052163 FBgn0267555	CG32163 CR45895
DRSC21888	FBgn0052163 FBgn0267555	CG32163 CR45895
DRSC10350	FBgn0042178 FBgn0042177	CG32165 CG32164
DRSC10349	FBgn0042178 FBgn0042177	CG32165 CG32164
DRSC26756	FBgn0052189 FBgn0052188	CG32189 CG32188
DRSC09511	FBgn0052189 FBgn0052188	CG32189 CG32188
DRSC09510	FBgn0052189 FBgn0052188	CG32189 CG32188
DRSC28810	FBgn0052189 FBgn0052188	CG32189 CG32188
DRSC09615	FBgn0052213 FBgn0052208 FBgn0036873 FBgn0036872 FBgn0267714 FBgn0052214 FBgn0036871	CG32213 825-Oak CG18294 CG12519 CR46047 CG32214 CG14096
DRSC27977	FBgn0052214 FBgn0052213 FBgn0052208	CG32214 CG32213 825-Oak
DRSC09613	FBgn0052214 FBgn0052213 FBgn0052208	CG32214 CG32213 825-Oak
DRSC08195	FBgn0052270 FBgn0052269	CG32270 CG32269
DRSC22203	FBgn0052278 FBgn0035409	CG32278 CG14963
DRSC07980	FBgn0052298 FBgn0052299	CG32298 CG32299
DRSC25827	FBgn0052298 FBgn0052299	CG32298 CG32299
DRSC22354	FBgn0052299 FBgn0052298	CG32299 CG32298
DRSC23255	FBgn0052318 FBgn0035194 FBgn0004378	CG32318 Psf1 Klp61F
DRSC11491	FBgn0052442 FBgn0264469	CG32442 CR43877
DRSC21673	FBgn0052453 FBgn0037177	CG32453 CG14454
DRSC29458	FBgn0052462 FBgn0263345	CG32462 CR43426
DRSC11851	FBgn0052462 FBgn0263345	CG32462 CR43426
DRSC21539	FBgn0052495 FBgn0030882	CG32495 GSS
DRSC20008	FBgn0052495 FBgn0030882	CG32495 GSS
DRSC21038	FBgn0052500 FBgn0052857 FBgn0053502	CG32500 CG32857 CG33502
DRSC20817	FBgn0052500 FBgn0052857 FBgn0053502	CG32500 CG32857 CG33502
DRSC20074	FBgn0052536 FBgn0052537	CG32536 CG32537
DRSC19474	FBgn0052547 FBgn0264394	CG32547 CR43842
DRSC19870	FBgn0052576 FBgn0030733	CG32576 UQCR-14
DRSC25269	FBgn0052576 FBgn0030733	CG32576 UQCR-14
DRSC28444	FBgn0052581 FBgn0030693	CG32581 CG8974
DRSC20136	FBgn0052581 FBgn0030693	CG32581 CG8974
DRSC21586	FBgn0052603 FBgn0035552 FBgn0004780	CG32603 CG11350 Ccp84Ad
DRSC41594	FBgn0034712 FBgn0283480	CG3264 Alp2
DRSC22885	FBgn0052640 FBgn0052641	CG32640 CG32641
DRSC07070	FBgn0052642 FBgn0034002	CG32642 CG8079
DRSC23954	FBgn0052706 FBgn0030085	CG32706 CG6999
DRSC18412	FBgn0052706 FBgn0030085	CG32706 CG6999
DRSC22766	FBgn0052713 FBgn0053223	CG32713 CG33223
DRSC28559	FBgn0052713 FBgn0053223	CG32713 CG33223
DRSC17572	FBgn0052713 FBgn0053223	CG32713 CG33223
DRSC18269	FBgn0052732 FBgn0029922	CG32732 CG14431
DRSC17294	FBgn0052786 FBgn0029686 FBgn0052783	CG32786 CG2941 CG32783
DRSC18244	FBgn0052786 FBgn0029686 FBgn0052783	CG32786 CG2941 CG32783
DRSC17964	FBgn0052801 FBgn0264446	CG32801 CR43864
DRSC25614	FBgn0052801 FBgn0264446	CG32801 CR43864
DRSC17963	FBgn0052803 FBgn0267591	CG32803 CR45929
DRSC18562	FBgn0023531 FBgn0029587	CG32809 CG14797
DRSC17249	FBgn0052817 FBgn0029524	CG32817 CG3176
DRSC22812	FBgn0052820 FBgn0040028 FBgn0052819	CG32820 CG17450 CG32819
DRSC27791	FBgn0052820 FBgn0040028 FBgn0052819	CG32820 CG17450 CG32819
DRSC21803	FBgn0052820 FBgn0040028 FBgn0052819	CG32820 CG17450 CG32819
DRSC21996	FBgn0052845 FBgn0050369 FBgn0029002	CG32845 CG30369 miple2
DRSC15342	FBgn0052939 FBgn0037731	CG32939 CG18542
DRSC10777	FBgn0053057 FBgn0035889	CG33057 mkg-p
DRSC27217	FBgn0053057 FBgn0035889	CG33057 mkg-p
DRSC14441	FBgn0053095 FBgn0053096	CG33095 CG33096
DRSC25968	FBgn0053095 FBgn0053096	CG33095 CG33096
DRSC14440	FBgn0053095 FBgn0053096	CG33095 CG33096
DRSC22366	FBgn0053170 FBgn0037199	CG33170 CG11137
DRSC12706	FBgn0053191 FBgn0046874	CG33191 Pif1B
DRSC08497	FBgn0053229 FBgn0262109	CG33229 CR42862
DRSC19162	FBgn0053252 FBgn0262485	CG33252 CG43075
DRSC10585	FBgn0053269 FBgn0053500 FBgn0053271 FBgn0053272	CG33269 CG33500 CG33271 CG33272
DRSC10584	FBgn0053270 FBgn0053271 FBgn0053269 FBgn0053272	CG33270 CG33271 CG33269 CG33272
DRSC10583	FBgn0053271 FBgn0053269	CG33271 CG33269
DRSC09116	FBgn0053272 FBgn0053269	CG33272 CG33269
DRSC13233	FBgn0053333 FBgn0267701	CG33333 CR46034
DRSC26007	FBgn0053462 FBgn0053461	CG33462 CG33461
DRSC22892	FBgn0053462 FBgn0053461	CG33462 CG33461
DRSC05417	FBgn0053470 FBgn0283462	CG33470 IMPPP
DRSC37817	FBgn0053632 FBgn0053912 FBgn0053764	CG33632 CG33912 CG33764
DRSC37820	FBgn0053664 FBgn0053667 FBgn0053668 FBgn0053665 FBgn0053666 FBgn0053669	CG33664 CG33667 CG33668 CG33665 CG33666 CG33669
DRSC06628	FBgn0061359 FBgn0061360	CG33671 CG33672
DRSC05356	FBgn0061359 FBgn0061360	CG33671 CG33672
DRSC37819	FBgn0053688 FBgn0053689	CG33688 CG33689
DRSC20542	FBgn0064116 FBgn0064117	CG33713 SLIRP1
DRSC37812	FBgn0053764 FBgn0053632 FBgn0053912	CG33764 CG33632 CG33912
DRSC37804	FBgn0053784 FBgn0053783	CG33784 CG33783
DRSC05988	FBgn0061361 FBgn0061362	CG33786 CG33785
DRSC26790	FBgn0061361 FBgn0061362	CG33786 CG33785
DRSC24614	FBgn0035240 FBgn0035239	CG33791 CG18170
DRSC08387	FBgn0035240 FBgn0035239	CG33791 CG18170
DRSC08523	FBgn0035240 FBgn0035239	CG33791 CG18170
DRSC41266	FBgn0035240 FBgn0035239	CG33791 CG18170
DRSC08601	FBgn0035240 FBgn0035239	CG33791 CG18170
DRSC39043	FBgn0035240 FBgn0035239 FBgn0010352	CG33791 CG18170 Nc73EF
DRSC37815	FBgn0053912 FBgn0053764 FBgn0053632	CG33912 CG33764 CG33632
DRSC38939	FBgn0053922 FBgn0053923	CG33922 CG33923
DRSC37808	FBgn0053923 FBgn0053922	CG33923 CG33922
DRSC15685	FBgn0064119 FBgn0260466	CG33934 Indy-2
DRSC15686	FBgn0064119 FBgn0260466	CG33934 Indy-2
DRSC07184	FBgn0053964 FBgn0033693	CG33964 CG13175
DRSC06301	FBgn0053964 FBgn0033693	CG33964 CG13175
DRSC06300	FBgn0053964 FBgn0033693	CG33964 CG13175
DRSC37791	FBgn0053965 FBgn0051636	CG33965 CG31636
DRSC04994	FBgn0033095 FBgn0266525	CG3409 CG45092
DRSC04008	FBgn0083941 FBgn0034900	CG34105 CG12491
DRSC04124	FBgn0083941 FBgn0034900	CG34105 CG12491
DRSC02178	FBgn0083942 FBgn0265607	CG34106 beat-IIIa
DRSC38910	FBgn0083942 FBgn0265607	CG34106 beat-IIIa
DRSC01577	FBgn0083942 FBgn0265607	CG34106 beat-IIIa
DRSC41360	FBgn0083942 FBgn0265607	CG34106 beat-IIIa
DRSC12235	FBgn0086608 FBgn0267814	CG34112 CR46139
DRSC08585	FBgn0083976 FBgn0083992	CG34140 Mkp
DRSC26000	FBgn0083976 FBgn0083992	CG34140 Mkp
DRSC41335	FBgn0085191 FBgn0261707	CG34162 CR42743
DRSC01190	FBgn0085191 FBgn0261707	CG34162 CR42743
DRSC00351	FBgn0085207 FBgn0085206	CG34178 CG34177
DRSC06567	FBgn0085219 FBgn0034168	CG34190 CG15614
DRSC38876	FBgn0085260 FBgn0033672	CG34231 rho-7
DRSC07278	FBgn0085263 FBgn0033744	CG34234 Dh44-R2
DRSC38685	FBgn0085287 FBgn0053710	CG34258 CG33710
DRSC38858	FBgn0085292 FBgn0035122	CG34263 mRpL17
DRSC38856	FBgn0085297 FBgn0085296	CG34268 CG34267
DRSC25567	FBgn0085306 FBgn0051542	CG34277 CG31542
DRSC38642	FBgn0085306 FBgn0051542	CG34277 CG31542
DRSC21544	FBgn0085306 FBgn0051542	CG34277 CG31542
DRSC38762	FBgn0085320 FBgn0051084	CG34291 CR31084
DRSC38871	FBgn0085341 FBgn0085264 FBgn0050058	CG34312 CG34235 CG30058
DRSC22142	FBgn0085341 FBgn0085264 FBgn0050058	CG34312 CG34235 CG30058
DRSC02782	FBgn0085342 FBgn0032618	CG34313 CG31743
DRSC02781	FBgn0085342 FBgn0032618	CG34313 CG31743
DRSC07642	FBgn0085344 FBgn0005654	CG34315 Orc3
DRSC25371	FBgn0085344 FBgn0005654	CG34315 Orc3
DRSC38705	FBgn0085361 FBgn0260871 FBgn0260873 FBgn0040784 FBgn0260870 FBgn0260869 FBgn0260868	CG34332 CG42581 CG42583 karr CG42580 CG42579 CG42578
DRSC38678	FBgn0085461 FBgn0085462	CG34432 CG34433
DRSC26034	FBgn0031430 FBgn0267738	CG3528 CR46069
DRSC29092	FBgn0031279 FBgn0000442	CG3544 Pkg21D
DRSC00772	FBgn0031279 FBgn0000442	CG3544 Pkg21D
DRSC15506	FBgn0038461 FBgn0038462	CG3678 CG17556
DRSC15241	FBgn0038461 FBgn0038462	CG3678 CG17556
DRSC06852	FBgn0033778 FBgn0263446	CG3790 CR43469
DRSC26193	FBgn0029867 FBgn0029868	CG3847 ND-B16.6
DRSC15530	FBgn0038291 FBgn0267160	CG3984 CR45600
DRSC38565	FBgn0058178 FBgn0266692	CG40178 CR45182
DRSC10400	FBgn0025558 FBgn0267525	CG4101 CR45865
DRSC10406	FBgn0036793 FBgn0036799	CG4174 CG13380
DRSC09988	FBgn0036793 FBgn0036799	CG4174 CG13380
DRSC40557	FBgn0087041 FBgn0000307	CG42231 chif
DRSC29385	FBgn0259145 FBgn0050267	CG42260 CR30267
DRSC03953	FBgn0259145 FBgn0050267	CG42260 CR30267
DRSC22342	FBgn0259179 FBgn0050274	CG42284 CG30274
DRSC19815	FBgn0259195 FBgn0259196	CG42299 CG42300
DRSC19680	FBgn0259195 FBgn0259196	CG42299 CG42300
DRSC23772	FBgn0259200 FBgn0259199	CG42304 Snup
DRSC22781	FBgn0259200 FBgn0259199	CG42304 Snup
DRSC08276	FBgn0259200 FBgn0259199	CG42304 Snup
DRSC39092	FBgn0259200 FBgn0259199	CG42304 Snup
DRSC08277	FBgn0259200 FBgn0259199	CG42304 Snup
DRSC11008	FBgn0259203 FBgn0002909	CG42307 mus312
DRSC27742	FBgn0259203 FBgn0002909	CG42307 mus312
DRSC17923	FBgn0259204 FBgn0052736	CG42308 CG32736
DRSC17922	FBgn0259204 FBgn0052736	CG42308 CG32736
DRSC21094	FBgn0259677 FBgn0032957	CG42346 CG2225
DRSC01835	FBgn0259677 FBgn0032957	CG42346 CG2225
DRSC23154	FBgn0259700 FBgn0259699	CG42354 CG42353
DRSC29165	FBgn0259700 FBgn0259699	CG42354 CG42353
DRSC04265	FBgn0259709 FBgn0259708	CG42363 CG42362
DRSC05602	FBgn0259718 FBgn0050100	CG42372 CG30100
DRSC30025	FBgn0259718 FBgn0050100	CG42372 CG30100
DRSC11085	FBgn0259720 FBgn0036856	CG42374 CG9666
DRSC26961	FBgn0259720 FBgn0036856	CG42374 CG9666
DRSC40578	FBgn0259739 FBgn0052192	CG42393 CG32192
DRSC40592	FBgn0259741 FBgn0038739	CG42395 CG4686
DRSC28824	FBgn0259917 FBgn0038421	CG42446 CG17931
DRSC15293	FBgn0259917 FBgn0038421	CG42446 CG17931
DRSC09867	FBgn0259932 FBgn0263251	CG42455 vnc
DRSC08224	FBgn0259933 FBgn0035436	CG42456 CG12016
DRSC25292	FBgn0259933 FBgn0035436	CG42456 CG12016
DRSC26329	FBgn0259990 FBgn0039565	CG42487 CG4884
DRSC15671	FBgn0259990 FBgn0039565	CG42487 CG4884
DRSC40595	FBgn0259990 FBgn0039565	CG42487 CG4884
DRSC04664	FBgn0260223 FBgn0027360	CG42497 Tim10
DRSC15309	FBgn0260231 FBgn0260230 FBgn0051358	CG42505 CG42504 CG31358
DRSC15308	FBgn0260231 FBgn0260230 FBgn0051358	CG42505 CG42504 CG31358
DRSC15235	FBgn0260231 FBgn0260230 FBgn0051358	CG42505 CG42504 CG31358
DRSC25045	FBgn0260233 FBgn0013263	CG42507 Trl
DRSC09325	FBgn0260233 FBgn0013263	CG42507 Trl
DRSC40682	FBgn0260233 FBgn0013263	CG42507 Trl
DRSC26052	FBgn0260237 FBgn0037689	CG42511 CG8135
DRSC16384	FBgn0260237 FBgn0037689	CG42511 CG8135
DRSC12739	FBgn0260237 FBgn0037689	CG42511 CG8135
DRSC19906	FBgn0260238 FBgn0052573	CG42512 CG32573
DRSC22782	FBgn0260238 FBgn0052573	CG42512 CG32573
DRSC19532	FBgn0260238 FBgn0052573	CG42512 CG32573
DRSC26599	FBgn0260388 FBgn0263131	CG42514 CG43373
DRSC10102	FBgn0260434 FBgn0036905	CG42529 ms(3)76Ca
DRSC12519	FBgn0260645 FBgn0027514	CG42537 CG1024
DRSC16329	FBgn0260759 FBgn0260760	CG42557 CG42558
DRSC13963	FBgn0260759 FBgn0260760	CG42557 CG42558
DRSC21873	FBgn0260761 FBgn0260762	CG42559 CG42560
DRSC29026	FBgn0260767 FBgn0034758 FBgn0034759	CG42565 CG13510 CG13511
DRSC04154	FBgn0260767 FBgn0034758 FBgn0034759	CG42565 CG13510 CG13511
DRSC04153	FBgn0260767 FBgn0034758 FBgn0034759	CG42565 CG13510 CG13511
DRSC04152	FBgn0260767 FBgn0034758 FBgn0034759	CG42565 CG13510 CG13511
DRSC28807	FBgn0260953 FBgn0051835	CG42585 CG31835
DRSC01412	FBgn0260953 FBgn0051835	CG42585 CG31835
DRSC37841	FBgn0260997 FBgn0085599	CG42598 CG41284
DRSC02450	FBgn0261358 FBgn0261357	CG42635 CG42634
DRSC10233	FBgn0261536 FBgn0261537 FBgn0035786	CG42660 CG42661 Tsp66A
DRSC05571	FBgn0261538 FBgn0050080	CG42662 CG30080
DRSC04256	FBgn0261554 FBgn0266642	CG42672 CR45149
DRSC05501	FBgn0261570 FBgn0264386 FBgn0265416 FBgn0036801 FBgn0265623 FBgn0036285 FBgn0265523 FBgn0013263 FBgn0260233 FBgn0263705 FBgn0030886 FBgn0053516 FBgn0052677 FBgn0266098 FBgn0040752 FBgn0011655 FBgn0011701 FBgn0015618 FBgn0266696 FBgn0052532 FBgn0261555 FBgn0036032 FBgn0263772 FBgn0263392 FBgn0029822 FBgn0000499 FBgn0003499 FBgn0264562 FBgn0031023 FBgn0085411 FBgn0035713 FBgn0028991 FBgn0033802 FBg…	CG42684 Ca-alpha1T Neto MYPT-75D Su(z)2 toe Smr Trl CG42507 Myo10A CG12672 dpr3 X11Lbeta rg Prosap Med repo Cdk8 CG45186 CG32532 CG42673 CG16711 CG43689 Tet CG12236 dsh sr Hr4 CG14200 CG34382 velo seq CG17724 Kdm4B Ptp99A Rdh
DRSC40513	FBgn0261581 FBgn0262824 FBgn0261580	CG42691 CG43195 CG42690
DRSC23109	FBgn0261611 FBgn0266809	CG42700 CR45271
DRSC27155	FBgn0261679 FBgn0261680	CG42726 CG42727
DRSC14485	FBgn0261679 FBgn0261680	CG42726 CG42727
DRSC10133	FBgn0261698 FBgn0266100	CG42732 CG44837
DRSC14141	FBgn0261704 FBgn0027544	CG42740 CG2217
DRSC38816	FBgn0262004 FBgn0262003	CG42822 CG42821
DRSC41465	FBgn0262363 FBgn0261060	CG43061 Sfp93F
DRSC04279	FBgn0262566 FBgn0266129	CG43106 lov
DRSC06892	FBgn0262570 FBgn0034225	CG43110 veil
DRSC41414	FBgn0262570 FBgn0034225	CG43110 veil
DRSC40541	FBgn0262807 FBgn0262790 FBgn0262837	CG43178 CG43171 CG43201
DRSC41365	FBgn0262824 FBgn0261580	CG43195 CG42690
DRSC04157	FBgn0263031 FBgn0263030	CG43326 CG43325
DRSC05640	FBgn0263033 FBgn0263032	CG43328 CG43327
DRSC03164	FBgn0263050 FBgn0263051	CG43345 CG43346
DRSC29184	FBgn0263081 FBgn0040723	CG43349 CG5011
DRSC00039	FBgn0263081 FBgn0040723	CG43349 CG5011
DRSC26325	FBgn0263113 FBgn0085223	CG43370 CG34194
DRSC15564	FBgn0038313 FBgn0267750	CG4338 CR46081
DRSC08861	FBgn0263387 FBgn0250849	CG43439 CG32388
DRSC15566	FBgn0038787 FBgn0267450	CG4360 CR45800
DRSC15148	FBgn0263750 FBgn0266410	CG43675 CG45050
DRSC17248	FBgn0263980 FBgn0261570 FBgn0263772 FBgn0052529 FBgn0003396 FBgn0260971 FBgn0029955 FBgn0039808 FBgn0052677 FBgn0024189 FBgn0041188 FBgn0052532 FBgn0259211 FBgn0267337 FBgn0021767 FBgn0020378 FBgn0263705 FBgn0259735 FBgn0263116 FBgn0083981 FBgn0004647 FBgn0264562 FBgn0264502 FBgn0003499 FBgn0264493 FBgn0003984 FBgn0261854 FBgn0263392 FBgn0265523 FBgn0262735 FBgn0039831 FBgn0030417 FBgn0029822 FBg…	CG43729 CG42684 CG43689 Hers shn CG42594 CG15478 CG12071 X11Lbeta sns Atx2 CG32532 grh rn org-1 Sp1 Myo10A CG42389 5-HT1B RunxA N Hr4 CG43901 sr rdx vn aPKC Tet Smr Imp CG12054 CG15725 CG12236 RasGAP1 tai HDAC4 luna tau CG43778 Neto seq Ptp99A CG17724 Kdm4B dar1
DRSC02607	FBgn0263982 FBgn0032755	CG43731 CG17344
DRSC14769	FBgn0263983 FBgn0261262	CG43732 CG42613
DRSC15802	FBgn0263983 FBgn0261262	CG43732 CG42613
DRSC03214	FBgn0263996 FBgn0032901	CG43739 sky
DRSC02383	FBgn0263996 FBgn0032901	CG43739 sky
DRSC03215	FBgn0263996 FBgn0032901	CG43739 sky
DRSC04206	FBgn0264298 FBgn0264299 FBgn0264297	CG43776 CG43777 CG43775
DRSC23270	FBgn0264301 FBgn0032503	CG43779 CG16825
DRSC24006	FBgn0264302 FBgn0264303	CG43780 CG43781
DRSC11007	FBgn0264302 FBgn0264303	CG43780 CG43781
DRSC02243	FBgn0264364 FBgn0045827	CG43816 CG13245
DRSC18204	FBgn0264502 FBgn0263772 FBgn0029944	CG43901 CG43689 Dok
DRSC23555	FBgn0264605 FBgn0063485	CG43954 Lasp
DRSC10379	FBgn0264605 FBgn0063485	CG43954 Lasp
DRSC14605	FBgn0264740 FBgn0264741	CG43998 CG43999
DRSC02898	FBgn0264742 FBgn0264743 FBgn0053995	CG44000 CG44001 CG33995
DRSC00853	FBgn0264742 FBgn0264743 FBgn0053995	CG44000 CG44001 CG33995
DRSC19897	FBgn0030432 FBgn0035601	CG4404 Uev1A
DRSC05966	FBgn0264894 FBgn0267824 FBgn0015618	CG44085 PRAS40 Cdk8
DRSC15225	FBgn0265083 FBgn0038107	CG44194 CG17327
DRSC10338	FBgn0265084 FBgn0261788	CG44195 Ank2
DRSC11278	FBgn0265084 FBgn0261788	CG44195 Ank2
DRSC07183	FBgn0265178 FBgn0262026	CG44243 CG42837
DRSC04178	FBgn0265188 FBgn0265187	CG44253 CG44252
DRSC07267	FBgn0265313 FBgn0028955	CG44286 CG8788
DRSC07529	FBgn0265373 FBgn0028407	CG44314 Drep3
DRSC26571	FBgn0265627 FBgn0265626	CG44435 CG44434
DRSC06517	FBgn0265627 FBgn0265626	CG44435 CG44434
DRSC21747	FBgn0266354 FBgn0278598	CG45002 CR46268
DRSC23550	FBgn0266434 FBgn0266435	CG45064 CG45065
DRSC20192	FBgn0266434 FBgn0266435	CG45064 CG45065
DRSC20193	FBgn0266434 FBgn0266435	CG45064 CG45065
DRSC04369	FBgn0266438 FBgn0266439	CG45068 CG45069
DRSC04368	FBgn0266438 FBgn0266439	CG45068 CG45069
DRSC07505	FBgn0266488 FBgn0003067	CG45087 Pepck
DRSC26468	FBgn0266488 FBgn0003067	CG45087 Pepck
DRSC23127	FBgn0266489 FBgn0027581	CG45088 CG6191
DRSC18159	FBgn0266490 FBgn0029971	CG45089 ND-MNLL
DRSC41540	FBgn0266540 FBgn0025355	CG45101 SuUR
DRSC11292	FBgn0266540 FBgn0025355	CG45101 SuUR
DRSC15622	FBgn0038740 FBgn0038739	CG4562 CG4686
DRSC27883	FBgn0267796 FBgn0267966	CG46121 CR46246
DRSC03361	FBgn0267964 FBgn0000464	CG46244 Lar
DRSC01707	FBgn0267964 FBgn0000464	CG46244 Lar
DRSC20696	FBgn0283434 FBgn0067861 FBgn0003654 FBgn0283433 FBgn0283432 FBgn0053497 FBgn0052823 FBgn0053499	CG46277 Sdic1 sw CG46276 CG46275 Sdic2 Sdic3 Sdic4
DRSC29154	FBgn0283434 FBgn0053499 FBgn0067861 FBgn0003654 FBgn0283433 FBgn0283432 FBgn0053497 FBgn0052823	CG46277 Sdic4 Sdic1 sw CG46276 CG46275 Sdic2 Sdic3
DRSC27952	FBgn0031299 FBgn0031298	CG4629 Atg4a
DRSC00659	FBgn0031299 FBgn0031298	CG4629 Atg4a
DRSC14962	FBgn0037998 FBgn0037997	CG4848 CG14742
DRSC39031	FBgn0034266 FBgn0034267	CG4975 CG4984
DRSC06907	FBgn0034266 FBgn0034267	CG4975 CG4984
DRSC24817	FBgn0034266 FBgn0034267	CG4975 CG4984
DRSC06908	FBgn0034266 FBgn0034267	CG4975 CG4984
DRSC15718	FBgn0039341 FBgn0265068	CG5112 CR44179
DRSC15720	FBgn0039339 FBgn0259991	CG5116 CG42488
DRSC40639	FBgn0039339 FBgn0259991	CG5116 CG42488
DRSC41586	FBgn0031907 FBgn0267924 FBgn0031908	CG5171 CR46205 CG5177
DRSC25324	FBgn0040383 FBgn0029531	CG5254 CG13362
DRSC13568	FBgn0038983 FBgn0267206	CG5326 CR45646
DRSC25926	FBgn0034363 FBgn0034364	CG5327 CG5493
DRSC19941	FBgn0030577 FBgn0030578	CG5334 CG5347
DRSC26211	FBgn0037773 FBgn0037772	CG5359 Spn85F
DRSC15789	FBgn0038944 FBgn0267721	CG5388 CR46054
DRSC02864	FBgn0032478 FBgn0032479	CG5458 CG16974
DRSC26510	FBgn0032478 FBgn0032479	CG5458 CG16974
DRSC06938	FBgn0034364 FBgn0034363	CG5493 CG5327
DRSC10517	FBgn0036760 FBgn0266685	CG5567 CR45175
DRSC14124	FBgn0027617 FBgn0267765	CG5808 CR46096
DRSC15886	FBgn0038682 FBgn0264916	CG5835 CR44107
DRSC02905	FBgn0032172 FBgn0263766	CG5850 CR43683
DRSC02906	FBgn0032167 FBgn0032166	CG5853 CG4619
DRSC15938	FBgn0039145 FBgn0264906	CG6000 CR44097
DRSC28104	FBgn0038927 FBgn0266538	CG6015 CG45099
DRSC15948	FBgn0038927 FBgn0266538	CG6015 CG45099
DRSC14611	FBgn0039158 FBgn0039159	CG6182 mRpS24
DRSC41270	FBgn0038321 FBgn0021750	CG6218 SerRS-m
DRSC27443	FBgn0030641 FBgn0030640	CG6299 CG6294
DRSC19980	FBgn0030641 FBgn0030640	CG6299 CG6294
DRSC16014	FBgn0038730 FBgn0038731	CG6300 CG11659
DRSC24222	FBgn0038730 FBgn0038731	CG6300 CG11659
DRSC18401	FBgn0029690 FBgn0267037	CG6414 CR45481
DRSC39120	FBgn0036403 FBgn0265295	CG6661 pncr014:3L
DRSC10687	FBgn0036403 FBgn0265295	CG6661 pncr014:3L
DRSC10698	FBgn0036056 FBgn0036057	CG6709 CG14164
DRSC10165	FBgn0036056 FBgn0036057	CG6709 CG14164
DRSC22793	FBgn0032296 FBgn0263528	CG6729 mir-4970
DRSC08994	FBgn0036030 FBgn0267454	CG6767 CR45804
DRSC26849	FBgn0030959 FBgn0030956	CG6961 CG18259
DRSC19799	FBgn0030959 FBgn0030956	CG6961 CG18259
DRSC20019	FBgn0030959 FBgn0030956	CG6961 CG18259
DRSC28448	FBgn0039008 FBgn0039007	CG6972 CCAP
DRSC10758	FBgn0036950 FBgn0052224	CG6996 CR32224
DRSC26356	FBgn0035102 FBgn0267456	CG7049 CR45806
DRSC08587	FBgn0035102 FBgn0267456	CG7049 CR45806
DRSC16189	FBgn0260467 FBgn0083967	CG7071 Muted
DRSC03032	FBgn0031970 FBgn0266331	CG7227 CR44996
DRSC11403	FBgn0036791 FBgn0003683	CG7271 term
DRSC22561	FBgn0036791 FBgn0003683	CG7271 term
DRSC30034	FBgn0036791 FBgn0003683	CG7271 term
DRSC10794	FBgn0036791 FBgn0003683	CG7271 term
DRSC21730	FBgn0036791 FBgn0003683	CG7271 term
DRSC28239	FBgn0032286 FBgn0265070	CG7300 CR44181
DRSC03044	FBgn0032286 FBgn0265070	CG7300 CR44181
DRSC27632	FBgn0037133 FBgn0037130	CG7370 Syn1
DRSC22768	FBgn0037133 FBgn0037130	CG7370 Syn1
DRSC10830	FBgn0036176 FBgn0053267	CG7377 CG33267
DRSC00704	FBgn0031344 FBgn0264873	CG7420 CR44064
DRSC25980	FBgn0035812 FBgn0035811	CG7457 CG12262
DRSC10871	FBgn0035793 FBgn0267556	CG7546 CR45896
DRSC39013	FBgn0032026 FBgn0051792 FBgn0010549	CG7627 CG31792 l(2)03659
DRSC27574	FBgn0033615 FBgn0033614	CG7741 Obp47b
DRSC06330	FBgn0033615 FBgn0033614	CG7741 Obp47b
DRSC04899	FBgn0033047 FBgn0278599	CG7882 CR46269
DRSC28664	FBgn0260468 FBgn0085346	CG7950 CG34317
DRSC16353	FBgn0260468 FBgn0085346	CG7950 CG34317
DRSC22848	FBgn0035252 FBgn0035251	CG7970 Vta1
DRSC07056	FBgn0033391 FBgn0266486	CG8026 CG45085
DRSC07055	FBgn0033391 FBgn0266486	CG8026 CG45085
DRSC06258	FBgn0034002 FBgn0259878	CG8079 Fs
DRSC07099	FBgn0034027 FBgn0267589	CG8187 CR45927
DRSC19451	FBgn0030675 FBgn0030676	CG8191 CG12379
DRSC16397	FBgn0037624 FBgn0037625 FBgn0083971	CG8223 CG11768 CG34135
DRSC27680	FBgn0033356 FBgn0053199	CG8229 CG33199
DRSC05134	FBgn0033356 FBgn0053199	CG8229 CG33199
DRSC27083	FBgn0037754 FBgn0037755	CG8500 CG12945
DRSC16437	FBgn0037757 FBgn0267819	CG8516 CR46144
DRSC10989	FBgn0035788 FBgn0051626	CG8541 CG31626
DRSC11023	FBgn0035742 FBgn0035741	CG8629 BBS1
DRSC25965	FBgn0033708 FBgn0261611	CG8850 CG42700
DRSC07287	FBgn0033708 FBgn0261611	CG8850 CG42700
DRSC07291	FBgn0033691 FBgn0266802	CG8860 CR45264
DRSC20129	FBgn0030815 FBgn0030813	CG8945 CG4949
DRSC20156	FBgn0030629 FBgn0030630	CG9123 CG12608
DRSC19472	FBgn0030629 FBgn0030630	CG9123 CG12608
DRSC22010	FBgn0035197 FBgn0035198	CG9130 CG9133
DRSC29697	FBgn0035197 FBgn0035198	CG9130 CG9133
DRSC08625	FBgn0035197 FBgn0035198	CG9130 CG9133
DRSC08624	FBgn0035197 FBgn0035198	CG9130 CG9133
DRSC24830	FBgn0031738 FBgn0051912	CG9171 CR31912
DRSC03152	FBgn0031738 FBgn0051912	CG9171 CR31912
DRSC21813	FBgn0031738 FBgn0051912	CG9171 CR31912
DRSC41372	FBgn0032916 FBgn0264353	CG9257 CR43809
DRSC11057	FBgn0036882 FBgn0264477	CG9279 CG43885
DRSC16468	FBgn0260464 FBgn0259721	CG9288 CG42375
DRSC29929	FBgn0032072 FBgn0266798	CG9483 CR45260
DRSC16508	FBgn0038365 FBgn0267551	CG9593 CR45891
DRSC27300	FBgn0031832 FBgn0031831	CG9596 COX5BL
DRSC02123	FBgn0031832 FBgn0031831	CG9596 COX5BL
DRSC22610	FBgn0037251 FBgn0264983	CG9804 CR44134
DRSC12338	FBgn0037251 FBgn0264983	CG9804 CR44134
DRSC25547	FBgn0037242 FBgn0267661	CG9855 CR45999
DRSC39062	FBgn0037242 FBgn0267661	CG9855 CR45999
DRSC04580	FBgn0034649 FBgn0259725 FBgn0259727 FBgn0259726	CG9865 CG42379 CG42381 CG42380
DRSC03884	FBgn0034649 FBgn0259725 FBgn0259727 FBgn0259726	CG9865 CG42379 CG42381 CG42380
DRSC04595	FBgn0034807 FBgn0261706 FBgn0003900	CG9897 CR42742 twi
DRSC20216	FBgn0030737 FBgn0267041 FBgn0027521	CG9914 CR45485 CG3679
DRSC00736	FBgn0031454 FBgn0031455	CG9960 Snapin
DRSC26185	FBgn0031454 FBgn0031455	CG9960 Snapin
DRSC05689	FBgn0263132 FBgn0267033 FBgn0086674 FBgn0023215 FBgn0031897 FBgn0030505 FBgn0283451 FBgn0264562 FBgn0085249 FBgn0264490 FBgn0261556 FBgn0029504	Cht6 mamo Tango13 Mnt CG13784 NFAT br Hr4 CG34220 Eip93F CG42674 CHES-1-like
DRSC09067	FBgn0262582 FBgn0085447 FBgn0024250 FBgn0034606 FBgn0052532 FBgn0261509 FBgn0266098 FBgn0030091 FBgn0003118 FBgn0259212 FBgn0030077 FBgn0260658 FBgn0259211 FBgn0052548 FBgn0027339 FBgn0011655 FBgn0029922 FBgn0083981 FBgn0003499 FBgn0265523 FBgn0033834 FBgn0083963 FBgn0261618 FBgn0029893 FBgn0028991 FBgn0033802 FBgn0053182	cic sif brk ASPP CG32532 haf rg CG7065 pnt cno CG15365 CG42541 grh CG32548 jim Med CG14431 RunxA sr Smr CG4744 Nlg3 larp CG14442 seq CG17724 Kdm4B
DRSC16377	FBgn0037613 FBgn0037612	Cks85A CG8112
DRSC06413	FBgn0033371 FBgn0033372	CNT1 CG13742
DRSC28676	FBgn0033371 FBgn0033372	CNT1 CG13742
DRSC16610	FBgn0015622 FBgn0264077	Cnx99A Cnx14D
DRSC06826	FBgn0050363 FBgn0050366	cola swif
DRSC21965	FBgn0050363 FBgn0050366	cola swif
DRSC25252	FBgn0263240 FBgn0263967	Coop CR43723
DRSC10344	FBgn0086900 FBgn0042118	Cpr65Ax1 Cpr65Ax2
DRSC10341	FBgn0086900 FBgn0042118	Cpr65Ax1 Cpr65Ax2
DRSC28050	FBgn0036108 FBgn0036109	Cpr67Fa1 Cpr67Fa2
DRSC10932	FBgn0036108 FBgn0036109	Cpr67Fa1 Cpr67Fa2
DRSC10315	FBgn0036109 FBgn0036108	Cpr67Fa2 Cpr67Fa1
DRSC11216	FBgn0017424 FBgn0002565	CR11538 Lsp2
DRSC09841	FBgn0017424 FBgn0002565	CR11538 Lsp2
DRSC24021	FBgn0017424 FBgn0002565	CR11538 Lsp2
DRSC14833	FBgn0040554 FBgn0038156	CR17025 CG14372
DRSC15168	FBgn0040554 FBgn0038156	CR17025 CG14372
DRSC14575	FBgn0051514 FBgn0037753	CR31514 CG12947
DRSC09531	FBgn0052194 FBgn0085282	CR32194 CG34253
DRSC21715	FBgn0052252 FBgn0263110	CR32252 CG43367
DRSC18942	FBgn0052652 FBgn0030356	CR32652 CR32661
DRSC19403	FBgn0052657 FBgn0052660	CR32657 CR32660
DRSC26079	FBgn0053987 FBgn0028979	CR33987 tio
DRSC38755	FBgn0058469 FBgn0267910	CR40469 MRE16
DRSC38772	FBgn0085505 FBgn0259849 FBgn0259850 FBgn0259864 FBgn0259863 FBgn0259862 FBgn0259860 FBgn0085673 FBgn0259869 FBgn0259842 FBgn0259843 FBgn0259859 FBgn0259857 FBgn0259856 FBgn0259855 FBgn0259840 FBgn0267444 FBgn0259817 FBgn0259870 FBgn0085523 FBgn0259845 FBgn0259841 FBgn0259838 FBgn0267446 FBgn0259851	CR40629 Su(Ste):CR42418 Su(Ste):CR42419 Su(Ste):CR42433 Su(Ste):CR42432 Su(Ste):CR42431 Su(Ste):CR42429 Su(Ste):CR41533 Su(Ste):CR42438 Su(Ste):CR42411 Su(Ste):CR42412 Su(Ste):CR42428 Su(Ste):CR42426 Su(Ste):CR42425 Su(Ste):CR42424 Su(Ste):CR42409 Su(Ste):CR45794 SteXh:CG42398 Su(Ste):CR42439 Su(Ste):CR40820 Su(Ste):CR42414 Su(Ste):CR42410 Su(Ste):CR42407 Su(Ste):CR45796 Su(Ste):CR42420
DRSC40623	FBgn0085764 FBgn0267497 FBgn0085761 FBgn0267504 FBgn0085760 FBgn0085799 FBgn0267505 FBgn0085822 FBgn0085795 FBgn0267507 FBgn0085758 FBgn0085759 FBgn0085773	CR40668 28SrRNA:CR45837 CR40642 28SrRNA:CR45844 CR40641 CR41544 pre-rRNA:CR45845 CR41613 CR41535 pre-rRNA:CR45847 CR40639 CR40640 CR40766
DRSC05503	FBgn0259112 FBgn0015602	CR42254 BEAF-32
DRSC12554	FBgn0261702 FBgn0037477	CR42738 CG14610
DRSC19794	FBgn0262687 FBgn0030356 FBgn0030357 FBgn0052660 FBgn0052652	CR43157 CR32661 Sclp CR32660 CR32652
DRSC11923	FBgn0262887 FBgn0003256 FBgn0266684	CR43242 rl CR45174
DRSC04612	FBgn0262902 FBgn0028738	CR43257 ETH
DRSC13640	FBgn0262974 FBgn0004187 FBgn0004186 FBgn0004185 FBgn0004183 FBgn0003916	CR43285 snRNA:U1:95Cc snRNA:U1:95Cb snRNA:U1:95Ca snRNA:U1:82Eb snRNA:U1:21D
DRSC20083	FBgn0262991 FBgn0030664	CR43299 CG8119
DRSC27407	FBgn0262991 FBgn0030664	CR43299 CG8119
DRSC03557	FBgn0266428 FBgn0001970	CR43463 Pgant35A
DRSC28249	FBgn0266428 FBgn0001970	CR43463 Pgant35A
DRSC29654	FBgn0263444 FBgn0026388	CR43467 Or46a
DRSC07490	FBgn0263444 FBgn0026388	CR43467 Or46a
DRSC21590	FBgn0263444 FBgn0026388	CR43467 Or46a
DRSC07489	FBgn0263444 FBgn0026388	CR43467 Or46a
DRSC06853	FBgn0263445 FBgn0025692	CR43468 CG3814
DRSC10200	FBgn0263447 FBgn0035755	CR43470 CG14830
DRSC26586	FBgn0263447 FBgn0035755	CR43470 CG14830
DRSC23246	FBgn0263453 FBgn0260487	CR43476 CG42534
DRSC12248	FBgn0263455 FBgn0037291	CR43478 CG14662
DRSC11191	FBgn0263492 FBgn0001227	CR43481 Hsp67Ba
DRSC23678	FBgn0263492 FBgn0001227	CR43481 Hsp67Ba
DRSC20628	FBgn0263504 FBgn0027279	CR43493 l(1)G0196
DRSC12364	FBgn0263619 FBgn0017550	CR43628 Rga
DRSC27424	FBgn0263981 FBgn0028424	CR43730 JhI-26
DRSC06851	FBgn0263981 FBgn0028424	CR43730 JhI-26
DRSC41542	FBgn0264328 FBgn0015040	CR43787 Cyp9c1
DRSC04607	FBgn0264328 FBgn0015040	CR43787 Cyp9c1
DRSC03173	FBgn0264353 FBgn0032916	CR43809 CG9257
DRSC02364	FBgn0264368 FBgn0028572	CR43820 qtc
DRSC02209	FBgn0264447 FBgn0085395	CR43865 Shawl
DRSC07047	FBgn0264496 FBgn0034092	CR43898 CG7798
DRSC17901	FBgn0264507 FBgn0029518	CR43906 CG13376
DRSC18622	FBgn0264507 FBgn0261446	CR43906 CG13377
DRSC27922	FBgn0264572 FBgn0011205	CR43944 fbl
DRSC11886	FBgn0264572 FBgn0011205	CR43944 fbl
DRSC13727	FBgn0264600 FBgn0266071	CR43949 CR44824
DRSC09409	FBgn0264600 FBgn0267660	CR43949 CR45998
DRSC17119	FBgn0264618 FBgn0026869	CR43958 Thd1
DRSC16795	FBgn0264791 FBgn0003134	CR44021 Pp1alpha-96A
DRSC16439	FBgn0264827 FBgn0037761	CR44035 CG8534
DRSC19919	FBgn0264862 FBgn0030795	CR44053 ppk28
DRSC19646	FBgn0264863 FBgn0030270	CR44054 CG15199
DRSC18878	FBgn0264863 FBgn0052667	CR44054 ssp7
DRSC26108	FBgn0264874 FBgn0031395	CR44065 CG10874
DRSC03408	FBgn0264892 FBgn0028406	CR44083 Drep4
DRSC16637	FBgn0264904 FBgn0004629	CR44095 Cys
DRSC03088	FBgn0264950 FBgn0031998	CR44119 SLC5A11
DRSC41337	FBgn0264961 FBgn0085240	CR44130 CG34211
DRSC12386	FBgn0265038 FBgn0022981	CR44155 rpk
DRSC21656	FBgn0265038 FBgn0022981	CR44155 rpk
DRSC22338	FBgn0265081 FBgn0051410	CR44192 Npc2e
DRSC06657	FBgn0265096 FBgn0283450	CR44201 Glo1
DRSC23207	FBgn0265103 FBgn0027589	CR44205 CG1688
DRSC29630	FBgn0265159 FBgn0037625 FBgn0083971	CR44228 CG11768 CG34135
DRSC14846	FBgn0265166 FBgn0038089	CR44235 d-cup
DRSC15744	FBgn0265169 FBgn0051269	CR44238 CG31269
DRSC28845	FBgn0265169 FBgn0051269	CR44238 CG31269
DRSC15903	FBgn0265205 FBgn0038872	CR44265 Nelf-A
DRSC19419	FBgn0265252 FBgn0030311	CR44266 CG11699
DRSC27489	FBgn0265252 FBgn0030311	CR44266 CG11699
DRSC07002	FBgn0265498 FBgn0033880	CR44367 CG6553
DRSC27057	FBgn0265510 FBgn0050087	CR44372 CG30087
DRSC21677	FBgn0265510 FBgn0050087	CR44372 CG30087
DRSC21764	FBgn0265510 FBgn0050088	CR44372 CG30088
DRSC24797	FBgn0265510 FBgn0050088	CR44372 CG30088
DRSC17909	FBgn0265531 FBgn0029596	CR44381 CG14054
DRSC21314	FBgn0265532 FBgn0025628	CR44382 CG4199
DRSC27951	FBgn0265532 FBgn0025628	CR44382 CG4199
DRSC05922	FBgn0265540 FBgn0263864	CR44390 Dark
DRSC25209	FBgn0265609 FBgn0030492	CR44427 CG15754
DRSC20568	FBgn0265613 FBgn0025814	CR44431 Mgstl
DRSC40550	FBgn0265651 FBgn0265652	CR44458 CR44459
DRSC07188	FBgn0265702 FBgn0034471	CR44509 Obp56e
DRSC03011	FBgn0265811 FBgn0032521	CR44600 CG7110
DRSC18455	FBgn0265901 FBgn0015036	CR44690 Cyp4ae1
DRSC27698	FBgn0265901 FBgn0015036	CR44690 Cyp4ae1
DRSC18458	FBgn0265901 FBgn0011576	CR44690 Cyp4d2
DRSC04079	FBgn0265914 FBgn0034582	CR44703 Cht9
DRSC24781	FBgn0265914 FBgn0034582	CR44703 Cht9
DRSC03856	FBgn0265937 FBgn0261554	CR44724 CG42672
DRSC22688	FBgn0266005 FBgn0040397	CR44779 CG3655
DRSC04489	FBgn0266042 FBgn0034909	CR44807 CG4797
DRSC00886	FBgn0266067 FBgn0266066	CR44820 CR44819
DRSC19349	FBgn0266115 FBgn0283473	CR44841 S6KL
DRSC23147	FBgn0266115 FBgn0283473	CR44841 S6KL
DRSC03556	FBgn0266143 FBgn0001967	CR44849 NimC3
DRSC28582	FBgn0266143 FBgn0001967	CR44849 NimC3
DRSC01910	FBgn0266144 FBgn0261534	CR44850 l(2)34Fc
DRSC00691	FBgn0266202 FBgn0002543	CR44897 robo2
DRSC02310	FBgn0266212 FBgn0045064	CR44907 bwa
DRSC40667	FBgn0266263 FBgn0003747	CR44958 Gr5a
DRSC19950	FBgn0266275 FBgn0053178	CR44960 CG33178
DRSC19974	FBgn0266276 FBgn0261703	CR44961 gce
DRSC19883	FBgn0266277 FBgn0030334	CR44962 Karl
DRSC00305	FBgn0266322 FBgn0031213	CR44987 galectin
DRSC40847	FBgn0266350 FBgn0262656	CR44999 Myc
DRSC01811	FBgn0266356 FBgn0051678	CR45004 CG31678
DRSC01102	FBgn0266359 FBgn0051713	CR45007 Apf
DRSC20966	FBgn0266361 FBgn0044872	CR45009 FucTC
DRSC16058	FBgn0266371 FBgn0051272	CR45015 CG31272
DRSC19711	FBgn0266376 FBgn0283680	CR45018 IP3K2
DRSC06571	FBgn0266379 FBgn0265045	CR45021 Strn-Mlck
DRSC25094	FBgn0266382 FBgn0038820	CR45024 CG4000
DRSC10512	FBgn0266384 FBgn0044419 FBgn0260458	CR45026 Pmi PGRP-LD
DRSC14869	FBgn0266404 FBgn0039625	CR45044 beta4GalNAcTB
DRSC22796	FBgn0266404 FBgn0041780	CR45044 Ssl2
DRSC16090	FBgn0266406 FBgn0051465	CR45046 CG31465
DRSC26353	FBgn0266406 FBgn0051465	CR45046 CG31465
DRSC41329	FBgn0266406 FBgn0053092	CR45046 P5CDh2
DRSC07594	FBgn0266577 FBgn0000337	CR45108 cn
DRSC06121	FBgn0266626 FBgn0033494	CR45133 KCNQ
DRSC13671	FBgn0266630 FBgn0267603	CR45137 CR45941
DRSC05914	FBgn0266634 FBgn0002069	CR45141 AspRS
DRSC06860	FBgn0266635 FBgn0086532	CR45142 Spt-I
DRSC04529	FBgn0266644 FBgn0034704	CR45151 CG6758
DRSC11346	FBgn0266654 FBgn0005633	CR45161 fln
DRSC28670	FBgn0266654 FBgn0005633	CR45161 fln
DRSC29696	FBgn0266681 FBgn0036110	CR45171 Cpr67Fb
DRSC10314	FBgn0266681 FBgn0036110	CR45171 Cpr67Fb
DRSC09230	FBgn0266682 FBgn0083978	CR45172 CG17672
DRSC21173	FBgn0266684 FBgn0262887 FBgn0029686	CR45174 CR43242 CG2941
DRSC38635	FBgn0266690 FBgn0266691 FBgn0264390	CR45180 CR45181 CR43838
DRSC23211	FBgn0267495 FBgn0263132	CR45185 Cht6
DRSC28593	FBgn0266732 FBgn0037783	CR45205 Npc2c
DRSC15523	FBgn0266732 FBgn0037783	CR45205 Npc2c
DRSC13202	FBgn0266740 FBgn0043069 FBgn0051274	CR45213 MESK4 CG31274
DRSC41331	FBgn0266742 FBgn0062412	CR45215 Ctr1B
DRSC22367	FBgn0266798 FBgn0052983	CR45260 CG32983
DRSC02509	FBgn0266798 FBgn0052986	CR45260 CG32986
DRSC28687	FBgn0266798 FBgn0052987	CR45260 CG32987
DRSC22373	FBgn0266798 FBgn0052987	CR45260 CG32987
DRSC02692	FBgn0266798 FBgn0052988	CR45260 CG32988
DRSC03226	FBgn0266798 FBgn0032072	CR45260 CG9483
DRSC25286	FBgn0266802 FBgn0033691	CR45264 CG8860
DRSC27344	FBgn0266809 FBgn0261611	CR45271 CG42700
DRSC06022	FBgn0266810 FBgn0034195	CR45272 Spn53F
DRSC06455	FBgn0266813 FBgn0034248	CR45275 CG14483
DRSC37897	FBgn0266869 FBgn0003920 FBgn0041720 FBgn0003922 FBgn0003923 FBgn0004191 FBgn0004192	CR45330 snRNA:U2:14B snRNA:U2:34ABc snRNA:U2:38ABa snRNA:U2:38ABb snRNA:U2:34ABa snRNA:U2:34ABb
DRSC37898	FBgn0266869 FBgn0041720 FBgn0004192 FBgn0003920 FBgn0003922 FBgn0003923 FBgn0004191	CR45330 snRNA:U2:34ABc snRNA:U2:34ABb snRNA:U2:14B snRNA:U2:38ABa snRNA:U2:38ABb snRNA:U2:34ABa
DRSC01798	FBgn0266886 FBgn0263533	CR45347 mir-4973
DRSC00445	FBgn0266903 FBgn0026319	CR45363 Traf4
DRSC02377	FBgn0266911 FBgn0032024	CR45371 CG14273
DRSC27247	FBgn0266911 FBgn0032024	CR45371 CG14273
DRSC11745	FBgn0266933 FBgn0037030	CR45384 CG3288
DRSC06680	FBgn0267024 FBgn0050486	CR45468 CG30486
DRSC24460	FBgn0267035 FBgn0023541	CR45479 Cyp4d14
DRSC18457	FBgn0267035 FBgn0023541	CR45479 Cyp4d14
DRSC28187	FBgn0267091 FBgn0029995	CR45535 CG2256
DRSC18220	FBgn0267091 FBgn0029995	CR45535 CG2256
DRSC19348	FBgn0267164 FBgn0027498	CR45604 CG2061
DRSC27047	FBgn0267164 FBgn0030263	CR45604 CG2076
DRSC19832	FBgn0267164 FBgn0030263	CR45604 CG2076
DRSC26320	FBgn0267164 FBgn0030262	CR45604 Vago
DRSC19833	FBgn0267164 FBgn0030262	CR45604 Vago
DRSC14927	FBgn0267165 FBgn0031702	CR45605 fusl
DRSC17995	FBgn0267189 FBgn0040941	CR45629 CG15308
DRSC28669	FBgn0267198 FBgn0267197	CR45638 CR45637
DRSC09768	FBgn0267242 FBgn0036289	CR45682 CG10657
DRSC27483	FBgn0267242 FBgn0036289	CR45682 CG10657
DRSC03449	FBgn0267243 FBgn0026760	CR45683 Tehao
DRSC08392	FBgn0267246 FBgn0261562	CR45686 CG42676
DRSC21844	FBgn0267277 FBgn0051626	CR45713 CG31626
DRSC01838	FBgn0267277 FBgn0051626	CR45713 CG31626
DRSC26434	FBgn0267278 FBgn0030925	CR45714 Hayan
DRSC22231	FBgn0267278 FBgn0030925	CR45714 Hayan
DRSC16808	FBgn0267448 FBgn0016700	CR45798 Rab1
DRSC07969	FBgn0267452 FBgn0052311	CR45802 zormin
DRSC08363	FBgn0267457 FBgn0035146	CR45807 CG13893
DRSC08395	FBgn0267464 FBgn0035243	CR45814 CG13926
DRSC27723	FBgn0267468 FBgn0011573	CR45818 Cdc37
DRSC08339	FBgn0267479 FBgn0052304	CR45829 obst-I
DRSC11002	FBgn0267485 FBgn0035771	CR45835 Sec63
DRSC24768	FBgn0267533 FBgn0035998	CR45873 CG3437
DRSC10366	FBgn0267533 FBgn0035998	CR45873 CG3437
DRSC11109	FBgn0267535 FBgn0025866	CR45875 CalpB
DRSC26995	FBgn0267554 FBgn0011693	CR45894 Pdh
DRSC10732	FBgn0267572 FBgn0036817	CR45912 CG6865
DRSC04626	FBgn0267588 FBgn0015268	CR45926 Nap1
DRSC25408	FBgn0267590 FBgn0021895	CR45928 ytr
DRSC04306	FBgn0267590 FBgn0021895	CR45928 ytr
DRSC25860	FBgn0267591 FBgn0052803	CR45929 CG32803
DRSC11702	FBgn0267605 FBgn0040636	CR45943 CG13255
DRSC11618	FBgn0267613 FBgn0041100	CR45951 park
DRSC11650	FBgn0267614 FBgn0037070	CR45952 CG11309
DRSC11668	FBgn0267622 FBgn0025702	CR45960 Srpk79D
DRSC11664	FBgn0267624 FBgn0004449	CR45962 Ten-m
DRSC27369	FBgn0267660 FBgn0264600	CR45998 CR43949
DRSC17617	FBgn0267660 FBgn0265523 FBgn0264600	CR45998 Smr CR43949
DRSC05691	FBgn0267660 FBgn0003984 FBgn0267580	CR45998 vn CR45920
DRSC12344	FBgn0267661 FBgn0037242	CR45999 CG9855
DRSC15008	FBgn0267693 FBgn0038435	CR46029 Gyc-89Da
DRSC15009	FBgn0267693 FBgn0038436	CR46029 Gyc-89Db
DRSC15993	FBgn0267705 FBgn0001321	CR46038 knk
DRSC25504	FBgn0267716 FBgn0028668	CR46049 Vha16-2
DRSC38615	FBgn0267717 FBgn0261553	CR46050 CG42671
DRSC00611	FBgn0267738 FBgn0031430	CR46069 CG3528
DRSC14751	FBgn0267742 FBgn0051072	CR46073 Lerp
DRSC15175	FBgn0267758 FBgn0039045	CR46089 CG17119
DRSC14291	FBgn0267766 FBgn0039250	CR46097 Mink
DRSC12615	FBgn0267803 FBgn0015571	CR46128 alpha-Est3
DRSC29224	FBgn0267815 FBgn0037231	CR46140 Vps24
DRSC12332	FBgn0267815 FBgn0037231	CR46140 Vps24
DRSC21570	FBgn0267818 FBgn0037534	CR46143 CG2781
DRSC10176	FBgn0267966 FBgn0267796	CR46246 CG46121
DRSC38790	FBgn0267983 FBgn0263665	CR46250 CR43656
DRSC38579	FBgn0267983 FBgn0263665	CR46250 CR43656
DRSC14710	FBgn0267994 FBgn0263117	CR46261 CG34377
DRSC00621	FBgn0267995 FBgn0031245	CR46262 CG3625
DRSC26295	FBgn0275432 FBgn0032335	CR46264 CG14915
DRSC02399	FBgn0275432 FBgn0032335	CR46264 CG14915
DRSC24587	FBgn0275434 FBgn0036380	CR46266 CG8757
DRSC11039	FBgn0275434 FBgn0036380	CR46266 CG8757
DRSC03797	FBgn0278598 FBgn0040009	CR46268 CG17490
DRSC26780	FBgn0278598 FBgn0040009	CR46268 CG17490
DRSC41276	FBgn0035636 FBgn0044419 FBgn0260458	Cralbp Pmi PGRP-LD
DRSC09743	FBgn0035636 FBgn0044419 FBgn0260458	Cralbp Pmi PGRP-LD
DRSC29136	FBgn0021738 FBgn0283657	Crg-1 Tlk
DRSC03516	FBgn0000392 FBgn0085339	cup CG34310
DRSC24610	FBgn0000392 FBgn0085339	cup CG34310
DRSC17833	FBgn0000394 FBgn0267081	cv CR45525
DRSC41330	FBgn0053503 FBgn0050489	Cyp12d1-d Cyp12d1-p
DRSC27261	FBgn0053503 FBgn0050489	Cyp12d1-d Cyp12d1-p
DRSC21507	FBgn0053503 FBgn0050489	Cyp12d1-d Cyp12d1-p
DRSC22946	FBgn0033302 FBgn0039904	Cyp6a14 Hcf
DRSC25647	FBgn0034756 FBgn0034740	Cyp6d2 nsr
DRSC27796	FBgn0004629 FBgn0264904	Cys CR44095
DRSC21262	FBgn0010358 FBgn0010359 FBgn0050025 FBgn0050031	deltaTry gammaTry CG30025 CG30031
DRSC27531	FBgn0010358 FBgn0010359 FBgn0050025 FBgn0050031 FBgn0003863	deltaTry gammaTry CG30025 CG30031 alphaTry
DRSC07622	FBgn0010358 FBgn0010359 FBgn0050031 FBgn0050025 FBgn0003863	deltaTry gammaTry CG30031 CG30025 alphaTry
DRSC40759	FBgn0086687 FBgn0043043	Desat1 Desat2
DRSC12625	FBgn0037463 FBgn0019828	djl dj
DRSC27072	FBgn0260775 FBgn0260770	DnaJ-60 CG42568
DRSC04611	FBgn0260775 FBgn0260770	DnaJ-60 CG42568
DRSC04207	FBgn0260775 FBgn0260770	DnaJ-60 CG42568
DRSC03312	FBgn0004407 FBgn0064115	DNApol-gamma35 GatC
DRSC24109	FBgn0015663 FBgn0031554	Dot CG15418
DRSC07605	FBgn0010109 FBgn0265302	dpn CR44275
DRSC40866	FBgn0020381 FBgn0283549	Dredd mir-9372
DRSC05393	FBgn0033791 FBgn0033792	Drl-2 CG13325
DRSC40703	FBgn0283461 FBgn0052268	Drs Drsl6
DRSC08034	FBgn0052282 FBgn0035434	Drsl4 Drsl5
DRSC29469	FBgn0250837 FBgn0267425	dUTPase CR45778
DRSC01998	FBgn0250837 FBgn0267425	dUTPase CR45778
DRSC16232	FBgn0260003 FBgn0065080	Dys snoRNA:Me18S-A1374
DRSC27471	FBgn0033166 FBgn0263529	Eaf mir-4977
DRSC19149	FBgn0000535 FBgn0259145 FBgn0265859 FBgn0263980	eag CG42260 CR44648 CG43729
DRSC38777	FBgn0027066 FBgn0034403	Eb1 CG18190
DRSC13113	FBgn0000451 FBgn0264600 FBgn0011785 FBgn0266071 FBgn0027655	ect CR43949 BRWD3 CR44824 htt
DRSC28455	FBgn0086908 FBgn0264876	egg CR44067
DRSC22534	FBgn0086908 FBgn0264876	egg CR44067
DRSC21446	FBgn0004911 FBgn0004910	Eip63F-2 Eip63F-1
DRSC00282	FBgn0039916 FBgn0051960	Ekar CG31960
DRSC21858	FBgn0039916 FBgn0051960	Ekar CG31960
DRSC18737	FBgn0260400 FBgn0023535	elav arg
DRSC29488	FBgn0260400 FBgn0023535	elav arg
DRSC09860	FBgn0052072 FBgn0036128	Elo68alpha Elo68beta
DRSC00330	FBgn0031250 FBgn0266907	Ent1 CR45367
DRSC07611	FBgn0010425 FBgn0003863	epsilonTry alphaTry
DRSC10840	FBgn0035849 FBgn0267530 FBgn0267529	ERR CR45870 CR45869
DRSC00325	FBgn0005660 FBgn0031261	Ets21C nAChRbeta3
DRSC13190	FBgn0262111 FBgn0036801 FBgn0265523 FBgn0035713 FBgn0052532 FBgn0003499 FBgn0036134 FBgn0030886 FBgn0020445 FBgn0031343 FBgn0035802 FBgn0261549 FBgn0031001 FBgn0016694 FBgn0003028 FBgn0265296 FBgn0029894 FBgn0039346 FBgn0260971 FBgn0004414 FBgn0031023 FBgn0031306 FBgn0036179 FBgn0004795 FBgn0033108	f MYPT-75D Smr velo CG32532 sr FoxK CG12672 E23 CG18131 Pura rdgA CG7884 Pdp1 ovo Dscam2 CG14440 CG5079 CG42594 msopa CG14200 CG4577 CG7368 retn CG15236
DRSC28045	FBgn0028741 FBgn0250851	fab1 CG33981
DRSC07412	FBgn0028741 FBgn0250851	fab1 CG33981
DRSC16944	FBgn0266451 FBgn0266448	fau CG45078
DRSC27672	FBgn0266451 FBgn0266448 FBgn0266446	fau CG45078 CG45076
DRSC38616	FBgn0265047 FBgn0046214	FDY vig2
DRSC00557	FBgn0031633 FBgn0263575	Fnta mir-4912
DRSC10381	FBgn0042641 FBgn0052174	frc CG32174
DRSC10027	FBgn0267795 FBgn0267736	Frl CR46067
DRSC41289	FBgn0036169 FBgn0036170	Fuca CG11714
DRSC10591	FBgn0036169 FBgn0036170	Fuca CG11714
DRSC24562	FBgn0001089 FBgn0264448	Gal CR43866
DRSC03134	FBgn0001089 FBgn0264448	Gal CR43866
DRSC25341	FBgn0004435 FBgn0266487	Galphaq CG45086
DRSC07432	FBgn0004435 FBgn0266487	Galphaq CG45086
DRSC04686	FBgn0028552 FBgn0003353	gammaSnap1 sei
DRSC38953	FBgn0260639 FBgn0010097	gammaTub23C gammaTub37C
DRSC15961	FBgn0039487 FBgn0266736	gb CR45209
DRSC21531	FBgn0051414 FBgn0264844	Gba1b CR44052
DRSC25266	FBgn0261703 FBgn0266276	gce CR44961
DRSC11350	FBgn0028377 FBgn0001099	gdl-ORF39 gdl
DRSC26948	FBgn0039580 FBgn0267773	Gfat2 CR46104
DRSC29885	FBgn0034372 FBgn0259202	Gint3 CG42306
DRSC06934	FBgn0034372 FBgn0259202	Gint3 CG42306
DRSC11817	FBgn0264561 FBgn0264554	Glg1 CR43933
DRSC28959	FBgn0265191 FBgn0265180	Glycogenin CG44245
DRSC18603	FBgn0265139 FBgn0259108	Gr2a futsch
DRSC21637	FBgn0045487 FBgn0045486	Gr36a Gr36b
DRSC18085	FBgn0003747 FBgn0266263	Gr5a CR44958
DRSC27568	FBgn0045478 FBgn0045477	Gr64b Gr64c
DRSC08445	FBgn0045478 FBgn0045477	Gr64b Gr64c
DRSC08444	FBgn0045478 FBgn0045477	Gr64b Gr64c
DRSC28375	FBgn0035486 FBgn0266402 FBgn0045476	Gr64d CR45042 Gr64e
DRSC08446	FBgn0035486 FBgn0045476	Gr64d Gr64e
DRSC21941	FBgn0045468 FBgn0264896	Gr93d CR44087
DRSC23169	FBgn0015946 FBgn0267636	grim CR45974
DRSC16685	FBgn0010040 FBgn0010039	GstD4 GstD3
DRSC38958	FBgn0010040 FBgn0010043 FBgn0010038 FBgn0001149	GstD4 GstD7 GstD2 GstD1
DRSC11180	FBgn0266136 FBgn0261360	Gyc76C CG42637
DRSC14990	FBgn0038334 FBgn0262483	h-cup Rbp
DRSC12352	FBgn0025825 FBgn0266539	HDAC3 CG45100
DRSC38701	FBgn0260484 FBgn0029676	HIP HIP-R
DRSC27912	FBgn0260484 FBgn0029676	HIP HIP-R
DRSC18245	FBgn0260484 FBgn0029676	HIP HIP-R
DRSC21266	FBgn0053810 FBgn0053813 FBgn0053804 FBgn0053801 FBgn0053807 FBgn0053816 FBgn0053819 FBgn0053864 FBgn0053858 FBgn0053846 FBgn0053828 FBgn0053849 FBgn0053837 FBgn0051617 FBgn0053825 FBgn0053834 FBgn0053861 FBgn0053840 FBgn0053822 FBgn0053831 FBgn0053855 FBgn0053843 FBgn0053852	His1:CG33810 His1:CG33813 His1:CG33804 His1:CG33801 His1:CG33807 His1:CG33816 His1:CG33819 His1:CG33864 His1:CG33858 His1:CG33846 His1:CG33828 His1:CG33849 His1:CG33837 His1:CG31617 His1:CG33825 His1:CG33834 His1:CG33861 His1:CG33840 His1:CG33822 His1:CG33831 His1:CG33855 His1:CG33843 His1:CG33852
DRSC25850	FBgn0053808 FBgn0053814 FBgn0053817 FBgn0053859 FBgn0053856 FBgn0053838 FBgn0053847 FBgn0053829 FBgn0053865 FBgn0053823 FBgn0051618 FBgn0053862 FBgn0053826 FBgn0053835 FBgn0053832 FBgn0053850 FBgn0053820 FBgn0053841 FBgn0053853 FBgn0053844 FBgn0061209	His2A:CG33808 His2A:CG33814 His2A:CG33817 His2A:CG33859 His2A:CG33856 His2A:CG33838 His2A:CG33847 His2A:CG33829 His2A:CG33865 His2A:CG33823 His2A:CG31618 His2A:CG33862 His2A:CG33826 His2A:CG33835 His2A:CG33832 His2A:CG33850 His2A:CG33820 His2A:CG33841 His2A:CG33853 His2A:CG33844 His2B:CG17949
DRSC21264	FBgn0053814 FBgn0053817 FBgn0053808 FBgn0053859 FBgn0053838 FBgn0053856 FBgn0053829 FBgn0053847 FBgn0053865 FBgn0053823 FBgn0053862 FBgn0051618 FBgn0053826 FBgn0053835 FBgn0053832 FBgn0053850 FBgn0053820 FBgn0053841 FBgn0053844 FBgn0053853 FBgn0053730	His2A:CG33814 His2A:CG33817 His2A:CG33808 His2A:CG33859 His2A:CG33838 His2A:CG33856 His2A:CG33829 His2A:CG33847 His2A:CG33865 His2A:CG33823 His2A:CG33862 His2A:CG31618 His2A:CG33826 His2A:CG33835 His2A:CG33832 His2A:CG33850 His2A:CG33820 His2A:CG33841 His2A:CG33844 His2A:CG33853 snmRNA:430:CR33730
DRSC21267	FBgn0053803 FBgn0053812 FBgn0053815 FBgn0053806 FBgn0053818 FBgn0053809 FBgn0053827 FBgn0053845 FBgn0051613 FBgn0053863 FBgn0053866 FBgn0053848 FBgn0053839 FBgn0053857 FBgn0053860 FBgn0053836 FBgn0053824 FBgn0053851 FBgn0053833 FBgn0053821 FBgn0053830 FBgn0053854 FBgn0053842	His3:CG33803 His3:CG33812 His3:CG33815 His3:CG33806 His3:CG33818 His3:CG33809 His3:CG33827 His3:CG33845 His3:CG31613 His3:CG33863 His3:CG33866 His3:CG33848 His3:CG33839 His3:CG33857 His3:CG33860 His3:CG33836 His3:CG33824 His3:CG33851 His3:CG33833 His3:CG33821 His3:CG33830 His3:CG33854 His3:CG33842
DRSC27099	FBgn0053803 FBgn0053812 FBgn0053815 FBgn0053806 FBgn0053818 FBgn0053809 FBgn0053845 FBgn0053827 FBgn0051613 FBgn0053863 FBgn0053866 FBgn0053848 FBgn0053839 FBgn0053857 FBgn0053860 FBgn0053836 FBgn0053824 FBgn0053851 FBgn0053833 FBgn0053821 FBgn0053830 FBgn0053854 FBgn0053842	His3:CG33803 His3:CG33812 His3:CG33815 His3:CG33806 His3:CG33818 His3:CG33809 His3:CG33845 His3:CG33827 His3:CG31613 His3:CG33863 His3:CG33866 His3:CG33848 His3:CG33839 His3:CG33857 His3:CG33860 His3:CG33836 His3:CG33824 His3:CG33851 His3:CG33833 His3:CG33821 His3:CG33830 His3:CG33854 His3:CG33842
DRSC22051	FBgn0053803 FBgn0053812 FBgn0053815 FBgn0053806 FBgn0053818 FBgn0053827 FBgn0053809 FBgn0053845 FBgn0051613 FBgn0053863 FBgn0053866 FBgn0053839 FBgn0053857 FBgn0053848 FBgn0053836 FBgn0053860 FBgn0053824 FBgn0053833 FBgn0053851 FBgn0053830 FBgn0053821 FBgn0053854 FBgn0053842	His3:CG33803 His3:CG33812 His3:CG33815 His3:CG33806 His3:CG33818 His3:CG33827 His3:CG33809 His3:CG33845 His3:CG31613 His3:CG33863 His3:CG33866 His3:CG33839 His3:CG33857 His3:CG33848 His3:CG33836 His3:CG33860 His3:CG33824 His3:CG33833 His3:CG33851 His3:CG33830 His3:CG33821 His3:CG33854 His3:CG33842
DRSC21268	FBgn0053907 FBgn0053905 FBgn0053903 FBgn0053901 FBgn0053891 FBgn0053877 FBgn0053895 FBgn0053881 FBgn0053875 FBgn0053893 FBgn0053883 FBgn0053873 FBgn0053899 FBgn0053885 FBgn0053897 FBgn0053871 FBgn0053887 FBgn0053889 FBgn0053909 FBgn0053879 FBgn0051611 FBgn0053869	His4:CG33907 His4:CG33905 His4:CG33903 His4:CG33901 His4:CG33891 His4:CG33877 His4:CG33895 His4:CG33881 His4:CG33875 His4:CG33893 His4:CG33883 His4:CG33873 His4:CG33899 His4:CG33885 His4:CG33897 His4:CG33871 His4:CG33887 His4:CG33889 His4:CG33909 His4:CG33879 His4:CG31611 His4:CG33869
DRSC30020	FBgn0053907 FBgn0053905 FBgn0053903 FBgn0053901 FBgn0053891 FBgn0053877 FBgn0053895 FBgn0053881 FBgn0053893 FBgn0053883 FBgn0053899 FBgn0053885 FBgn0053897 FBgn0053887 FBgn0053889 FBgn0053909 FBgn0053879 FBgn0051611 FBgn0053875 FBgn0053873 FBgn0053871 FBgn0053869	His4:CG33907 His4:CG33905 His4:CG33903 His4:CG33901 His4:CG33891 His4:CG33877 His4:CG33895 His4:CG33881 His4:CG33893 His4:CG33883 His4:CG33899 His4:CG33885 His4:CG33897 His4:CG33887 His4:CG33889 His4:CG33909 His4:CG33879 His4:CG31611 His4:CG33875 His4:CG33873 His4:CG33871 His4:CG33869
DRSC40767	FBgn0000448 FBgn0033497	Hr3 CG12912
DRSC25772	FBgn0000448 FBgn0033497	Hr3 CG12912
DRSC07441	FBgn0000448 FBgn0033497	Hr3 CG12912
DRSC08769	FBgn0264562 FBgn0030340 FBgn0028991 FBgn0033802 FBgn0036179 FBgn0263772 FBgn0035713 FBgn0039808 FBgn0050089 FBgn0004511 FBgn0015618 FBgn0020378 FBgn0041210 FBgn0086674 FBgn0034022 FBgn0029822 FBgn0003345 FBgn0011676 FBgn0039862 FBgn0265523 FBgn0032129 FBgn0029955 FBgn0267337 FBgn0000233 FBgn0261618 FBgn0014388 FBgn0000180	Hr4 CG15740 seq CG17724 CG7368 CG43689 velo CG12071 CG30089 dy Cdk8 Sp1 HDAC4 Tango13 CG12964 CG12236 sd Nos kek6 Smr jp CG15478 rn btd larp sty bib
DRSC11192	FBgn0001223 FBgn0001228	Hsp22 CG4456
DRSC11187	FBgn0001223 FBgn0001228	Hsp22 CG4456
DRSC26877	FBgn0001224 FBgn0001226	Hsp23 Hsp27
DRSC29327	FBgn0013276 FBgn0013275	Hsp70Ab Hsp70Aa
DRSC15380	FBgn0013276 FBgn0013277 FBgn0013278 FBgn0013279 FBgn0051354 FBgn0013275	Hsp70Ab Hsp70Ba Hsp70Bb Hsp70Bc Hsp70Bbb Hsp70Aa
DRSC21247	FBgn0013276 FBgn0013277 FBgn0013278 FBgn0013279 FBgn0051354 FBgn0013275	Hsp70Ab Hsp70Ba Hsp70Bb Hsp70Bc Hsp70Bbb Hsp70Aa
DRSC21246	FBgn0013276 FBgn0013278 FBgn0051354 FBgn0013275	Hsp70Ab Hsp70Bb Hsp70Bbb Hsp70Aa
DRSC15885	FBgn0013277 FBgn0013278 FBgn0051354 FBgn0038058	Hsp70Ba Hsp70Bb Hsp70Bbb CG5608
DRSC21248	FBgn0013277 FBgn0013278 FBgn0013279 FBgn0051354 FBgn0013276 FBgn0013275	Hsp70Ba Hsp70Bb Hsp70Bc Hsp70Bbb Hsp70Ab Hsp70Aa
DRSC07629	FBgn0263391 FBgn0263378	hts CR43430
DRSC06825	FBgn0050364 FBgn0050365	hubl spaw
DRSC06824	FBgn0050364 FBgn0050365	hubl spaw
DRSC10174	FBgn0044051 FBgn0044328	Ilp1 CG32052
DRSC40843	FBgn0004784 FBgn0003091	inaC Pkc53E
DRSC28607	FBgn0259918 FBgn0260812 FBgn0085350 FBgn0085351	inaF-B inaF-D inaF-C inaF-A
DRSC20342	FBgn0259918 FBgn0260812 FBgn0085350 FBgn0085351	inaF-B inaF-D inaF-C inaF-A
DRSC18513	FBgn0025394 FBgn0025393	inc CG14795
DRSC26338	FBgn0025394 FBgn0025393	inc CG14795
DRSC00033	FBgn0283499 FBgn0265523 FBgn0261053 FBgn0085478	InR Smr Cad86C CG34449
DRSC00528	FBgn0031209 FBgn0263584	Ir21a CR43609
DRSC03434	FBgn0020906 FBgn0035663 FBgn0250815	Jon25Bi CG6462 Jon65Aiv
DRSC22574	FBgn0031654 FBgn0003356 FBgn0003357	Jon25Bii Jon99Cii Jon99Ciii
DRSC10649	FBgn0250815 FBgn0035665 FBgn0035670	Jon65Aiv Jon65Aiii CG10472
DRSC28611	FBgn0035887 FBgn0035886	Jon66Cii Jon66Ci
DRSC16859	FBgn0003356 FBgn0003357	Jon99Cii Jon99Ciii
DRSC16858	FBgn0003356 FBgn0003357	Jon99Cii Jon99Ciii
DRSC26496	FBgn0039778 FBgn0039777	Jon99Fi Jon99Fii
DRSC15430	FBgn0039778 FBgn0039777	Jon99Fi Jon99Fii
DRSC29104	FBgn0039778 FBgn0039777 FBgn0003356 FBgn0003357	Jon99Fi Jon99Fii Jon99Cii Jon99Ciii
DRSC15298	FBgn0039778 FBgn0039777 FBgn0003356 FBgn0003357	Jon99Fi Jon99Fii Jon99Cii Jon99Ciii
DRSC06619	FBgn0040513 FBgn0050503	kappaB-Ras CG30503
DRSC25242	FBgn0033494 FBgn0266626	KCNQ CR45133
DRSC38717	FBgn0039925 FBgn0052000 FBgn0058191 FBgn0033302 FBgn0086378 FBgn0037383 FBgn0003256 FBgn0266632	Kif3C CG32000 CG40191 Cyp6a14 Alg-2 CG2023 rl CR45139
DRSC00521	FBgn0266557 FBgn0265152	kis CR44221
DRSC38577	FBgn0265003 FBgn0266044 FBgn0002566	koi CR44809 lt
DRSC29265	FBgn0026064 FBgn0026063	KP78a KP78b
DRSC16721	FBgn0026064 FBgn0026063	KP78a KP78b
DRSC16722	FBgn0026064 FBgn0026063	KP78a KP78b
DRSC23341	FBgn0026064 FBgn0026063	KP78a KP78b
DRSC23338	FBgn0026064 FBgn0026063	KP78a KP78b
DRSC03355	FBgn0266450 FBgn0266445	Kr-h1 CG45075
DRSC00908	FBgn0266450 FBgn0266445	Kr-h1 CG45075
DRSC23629	FBgn0266450 FBgn0266445	Kr-h1 CG45075
DRSC37863	FBgn0016970 FBgn0053774	l(2)k10201 CG33774
DRSC15889	FBgn0010926 FBgn0038516	l(3)07882 P5cr-2
DRSC08793	FBgn0002440 FBgn0267667	l(3)mbn CR46005
DRSC20257	FBgn0010240 FBgn0053180	Lcch3 Ranbp16
DRSC10340	FBgn0020644 FBgn0020643	Lcp65Ab1 Lcp65Ab2
DRSC29739	FBgn0020644 FBgn0020643	Lcp65Ab1 Lcp65Ab2
DRSC10343	FBgn0020644 FBgn0020643	Lcp65Ab1 Lcp65Ab2
DRSC11213	FBgn0020639 FBgn0086611 FBgn0020637 FBgn0020638	Lcp65Af Lcp65Ag3 Lcp65Ag2 Lcp65Ag1
DRSC11215	FBgn0020638 FBgn0086611 FBgn0020637	Lcp65Ag1 Lcp65Ag3 Lcp65Ag2
DRSC11214	FBgn0020638 FBgn0086611 FBgn0020637	Lcp65Ag1 Lcp65Ag3 Lcp65Ag2
DRSC10345	FBgn0020638 FBgn0086611 FBgn0020637	Lcp65Ag1 Lcp65Ag3 Lcp65Ag2
DRSC15704	FBgn0039354 FBgn0266752	Lgr3 CR45225
DRSC36705	FBgn0261524 FBgn0024326	lic Mkk4
DRSC10022	FBgn0028418 FBgn0266117	Lk CR44843
DRSC03566	FBgn0085470 FBgn0250903	lmgB lmgA
DRSC24454	FBgn0085470 FBgn0250903	lmgB lmgA
DRSC02845	FBgn0067622 FBgn0032240	LSm-4 CG17768
DRSC26238	FBgn0004425 FBgn0004428 FBgn0004427	LysB LysE LysD
DRSC22743	FBgn0004427 FBgn0004425	LysD LysB
DRSC21249	FBgn0004427 FBgn0004425	LysD LysB
DRSC40863	FBgn0011648 FBgn0025800	Mad Smox
DRSC24311	FBgn0020633 FBgn0267531	Mcm7 CR45871
DRSC11219	FBgn0020633 FBgn0267531	Mcm7 CR45871
DRSC06917	FBgn0260401 FBgn0260392	MED9 CG42518
DRSC29292	FBgn0028581 FBgn0002709	mei-217 mei-218
DRSC20349	FBgn0028581 FBgn0002709	mei-217 mei-218
DRSC39137	FBgn0002719 FBgn0029155	Men Men-b
DRSC29015	FBgn0029153 FBgn0029154	Menl-2 Menl-1
DRSC07470	FBgn0029153 FBgn0029154	Menl-2 Menl-1
DRSC07469	FBgn0029153 FBgn0029154	Menl-2 Menl-1
DRSC29362	FBgn0035357 FBgn0250911	MEP-1 CG42245
DRSC08274	FBgn0035357 FBgn0250911	MEP-1 CG42245
DRSC07993	FBgn0035357 FBgn0250911	MEP-1 CG42245
DRSC21460	FBgn0035357 FBgn0250911	MEP-1 CG42245
DRSC11221	FBgn0028415 FBgn0028416	Met75Cb Met75Ca
DRSC09549	FBgn0028415 FBgn0028416	Met75Cb Met75Ca
DRSC18682	FBgn0026060 FBgn0266264	Mipp2 CR44959
DRSC25515	FBgn0039581 FBgn0267774	Moca-cyp CR46105
DRSC15364	FBgn0039581 FBgn0267774	Moca-cyp CR46105
DRSC38759	FBgn0039280 FBgn0260229	Mocs2 CG42503
DRSC14219	FBgn0039280 FBgn0260229	Mocs2 CG42503
DRSC13697	FBgn0039280 FBgn0260229	Mocs2 CG42503
DRSC16371	FBgn0261019 FBgn0266195	moi Tgs1
DRSC39087	FBgn0261019 FBgn0266195	moi Tgs1
DRSC24535	FBgn0261019 FBgn0266195	moi Tgs1
DRSC10193	FBgn0260660 FBgn0267482	Mp CR45832
DRSC12124	FBgn0027930 FBgn0037231	MP1 Vps24
DRSC28577	FBgn0027930 FBgn0037231	MP1 Vps24
DRSC38742	FBgn0267910 FBgn0058469	MRE16 CR40469
DRSC05461	FBgn0050481 FBgn0053155	mRpL53 CG33155
DRSC29467	FBgn0050481 FBgn0053155	mRpL53 CG33155
DRSC21357	FBgn0044511 FBgn0038144	mRpS21 CG8870
DRSC12645	FBgn0037529 FBgn0037526	mRpS9 ArgRS-m
DRSC37905	FBgn0261836 FBgn0065104	Msp300 snmRNA:158
DRSC28786	FBgn0261349 FBgn0086681	Mst36Fb Mst36Fa
DRSC12597	FBgn0015770 FBgn0004172	MstProx Mst84Da
DRSC40577	FBgn0013674 FBgn0259216	mt:CoI RhoGAP102A
DRSC25990	FBgn0034219 FBgn0028956	mthl4 mthl3
DRSC06997	FBgn0034219 FBgn0028956	mthl4 mthl3
DRSC17005	FBgn0010438 FBgn0051287	mtSSB CG31287
DRSC28766	FBgn0261381 FBgn0261353	mtTFB1 Ccdc56
DRSC10809	FBgn0261381 FBgn0261353	mtTFB1 Ccdc56
DRSC18508	FBgn0025390 FBgn0023530	Mur2B CG3740
DRSC37805	FBgn0058002 FBgn0085736	ND-AGGG CG40472
DRSC38427	FBgn0002932 FBgn0063298	neur CR31429
DRSC17013	FBgn0002932 FBgn0063298	neur CR31429
DRSC18802	FBgn0002933 FBgn0010294	ng1 ng2
DRSC23988	FBgn0002933 FBgn0010294	ng1 ng2
DRSC18803	FBgn0010294 FBgn0002933	ng2 ng1
DRSC22528	FBgn0001967 FBgn0266143	NimC3 CR44849
DRSC41353	FBgn0004227 FBgn0015520	nonA nonA-l
DRSC15522	FBgn0051410 FBgn0265081	Npc2e CR44192
DRSC27267	FBgn0034740 FBgn0034739	nsr CG3927
DRSC02530	FBgn0021761 FBgn0032329	Nup154 Art8
DRSC11052	FBgn0263232 FBgn0036389	Nxf3 ssp2
DRSC23906	FBgn0263232 FBgn0036389	Nxf3 ssp2
DRSC05482	FBgn0050073 FBgn0050072	Obp50b Obp50c
DRSC21818	FBgn0050073 FBgn0050072	Obp50b Obp50c
DRSC22719	FBgn0043536 FBgn0034517	Obp57d Cpr57A
DRSC06708	FBgn0043536 FBgn0034517	Obp57d Cpr57A
DRSC15220	FBgn0038859 FBgn0038858	Obp93a CG5793
DRSC38969	FBgn0013308 FBgn0013307	Odc2 Odc1
DRSC26071	FBgn0030298 FBgn0045502	Or10a Gr10a
DRSC27634	FBgn0030298 FBgn0045502	Or10a Gr10a
DRSC18897	FBgn0030298 FBgn0045502	Or10a Gr10a
DRSC20264	FBgn0030298 FBgn0045502	Or10a Gr10a
DRSC22792	FBgn0030298 FBgn0045502	Or10a Gr10a
DRSC22604	FBgn0041626 FBgn0062565	Or19a Or19b
DRSC20684	FBgn0041626 FBgn0062565	Or19a Or19b
DRSC07488	FBgn0033422 FBgn0266819	Or45b CR45281
DRSC16770	FBgn0038203 FBgn0265168	Or88a CR44237
DRSC10541	FBgn0264307 FBgn0264305 FBgn0086680	orb2 CG43783 vvl
DRSC05259	FBgn0021767 FBgn0000625 FBgn0039225 FBgn0004647 FBgn0029822 FBgn0038592 FBgn0024189 FBgn0030077 FBgn0040765 FBgn0028991 FBgn0085411 FBgn0033802 FBgn0053182 FBgn0003301 FBgn0263392 FBgn0032656 FBgn0259736 FBgn0260794 FBgn0004101 FBgn0085376 FBgn0038676 FBgn0039808	org-1 eyg Ets96B N CG12236 CG18599 sns CG15365 luna seq CG34382 CG17724 Kdm4B rut Tet CG5674 CG42390 ctrip bs CG34347 CG6026 CG12071
DRSC19000	FBgn0021767 FBgn0002643 FBgn0026160 FBgn0263995 FBgn0052529 FBgn0004878 FBgn0266696 FBgn0003301 FBgn0003984 FBgn0052677 FBgn0034606 FBgn0038629 FBgn0029814 FBgn0265416 FBgn0052647 FBgn0260632 FBgn0040752 FBgn0030091 FBgn0052532 FBgn0003165 FBgn0263705 FBgn0041188 FBgn0259735 FBgn0262475 FBgn0024321 FBgn0045038 FBgn0264493 FBgn0029822 FBgn0039225 FBgn0083981	org-1 mam tna cpo Hers cas CG45186 rut vn X11Lbeta ASPP CG14304 CG15765 Neto CG32647 dl Prosap CG7065 CG32532 pum Myo10A Atx2 CG42389 bru-2 NK7.1 Proc rdx CG12236 Ets96B RunxA
DRSC39038	FBgn0261885 FBgn0025726	osa unc-13
DRSC28164	FBgn0015524 FBgn0262690	otp CR43160
DRSC13519	FBgn0053092 FBgn0083984	P5CDh2 CG34148
DRSC06073	FBgn0260398 FBgn0260390	Pbp49 CG42516
DRSC02422	FBgn0264815 FBgn0266365	Pde1c CR45013
DRSC11249	FBgn0011693 FBgn0267554	Pdh CR45894
DRSC02266	FBgn0040958 FBgn0266882	Peritrophin-15b CR45343
DRSC10645	FBgn0052226 FBgn0264464	Pex23 CR43872
DRSC28370	FBgn0052226 FBgn0264464	Pex23 CR43872
DRSC10513	FBgn0260458 FBgn0044419	PGRP-LD Pmi
DRSC10418	FBgn0035977 FBgn0035978	PGRP-LF UGP
DRSC25294	FBgn0043576 FBgn0033327	PGRP-SC1a PGRP-SC1b
DRSC07215	FBgn0043576 FBgn0033327	PGRP-SC1a PGRP-SC1b
DRSC06482	FBgn0043576 FBgn0033327	PGRP-SC1a PGRP-SC1b
DRSC14383	FBgn0046874 FBgn0261015	Pif1B Pif1A
DRSC14142	FBgn0046874 FBgn0261015	Pif1B Pif1A
DRSC14380	FBgn0046874 FBgn0261015	Pif1B Pif1A
DRSC14381	FBgn0046874 FBgn0261015	Pif1B Pif1A
DRSC27376	FBgn0020621 FBgn0050343	Pkn CG30343
DRSC21969	FBgn0020621 FBgn0050343	Pkn CG30343
DRSC39125	FBgn0262731 FBgn0263504 FBgn0063670	pncr013:4 CR43493 CG40228
DRSC39121	FBgn0265295 FBgn0036403 FBgn0036402	pncr014:3L CG6661 CG6650
DRSC09744	FBgn0035632 FBgn0267481	Ppat-Dpck CR45831
DRSC41599	FBgn0035632 FBgn0267481	Ppat-Dpck CR45831
DRSC03886	FBgn0050290 FBgn0260222	Ppcdc CG42496
DRSC02736	FBgn0065109 FBgn0065108	ppk11 ppk16
DRSC02737	FBgn0065109 FBgn0065108	ppk11 ppk16
DRSC07646	FBgn0264817 FBgn0283521	pre-lola-G lola
DRSC13478	FBgn0266171 FBgn0266172 FBgn0266170 FBgn0002781	pre-mod(mdg4)-AB pre-mod(mdg4)-E pre-mod(mdg4)-C mod(mdg4)
DRSC13477	FBgn0261837 FBgn0261838 FBgn0002781	pre-mod(mdg4)-T pre-mod(mdg4)-Z mod(mdg4)
DRSC17001	FBgn0261837 FBgn0261838 FBgn0002781	pre-mod(mdg4)-T pre-mod(mdg4)-Z mod(mdg4)
DRSC13476	FBgn0261844 FBgn0261845 FBgn0261843 FBgn0002781	pre-mod(mdg4)-V pre-mod(mdg4)-U pre-mod(mdg4)-W mod(mdg4)
DRSC41421	FBgn0261844 FBgn0261845 FBgn0261843 FBgn0261840	pre-mod(mdg4)-V pre-mod(mdg4)-U pre-mod(mdg4)-W pre-mod(mdg4)-X
DRSC16328	FBgn0261844 FBgn0261839 FBgn0261845 FBgn0261842 FBgn0261843 FBgn0002781 FBgn0261840 FBgn0261841	pre-mod(mdg4)-V pre-mod(mdg4)-Y pre-mod(mdg4)-U pre-mod(mdg4)-AE pre-mod(mdg4)-W mod(mdg4) pre-mod(mdg4)-X pre-mod(mdg4)-AD
DRSC38646	FBgn0267505 FBgn0267507 FBgn0085766 FBgn0085805 FBgn0267506 FBgn0267497 FBgn0267504	pre-rRNA:CR45845 pre-rRNA:CR45847 CR40679 CR41583 pre-rRNA:CR45846 28SrRNA:CR45837 28SrRNA:CR45844
DRSC16511	FBgn0040077 FBgn0040076	primo-1 primo-2
DRSC27823	FBgn0040077 FBgn0040076	primo-1 primo-2
DRSC07515	FBgn0263121 FBgn0050382	Prosalpha1 CG30382
DRSC29087	FBgn0263121 FBgn0050382	Prosalpha1 CG30382
DRSC10760	FBgn0036487 FBgn0036489	Prp31 CG7011
DRSC06211	FBgn0033520 FBgn0033521 FBgn0033518	Prx2540-1 CG12896 Prx2540-2
DRSC06148	FBgn0033520 FBgn0033521 FBgn0033518	Prx2540-1 CG12896 Prx2540-2
DRSC06080	FBgn0033520 FBgn0033521 FBgn0033518	Prx2540-1 CG12896 Prx2540-2
DRSC28111	FBgn0033520 FBgn0033521 FBgn0033518	Prx2540-1 CG12896 Prx2540-2
DRSC28598	FBgn0033518 FBgn0033520 FBgn0033521	Prx2540-2 Prx2540-1 CG12896
DRSC16214	FBgn0038570 FBgn0038571	Prx5 CG7215
DRSC16215	FBgn0038570 FBgn0038571	Prx5 CG7215
DRSC08638	FBgn0035194 FBgn0052318 FBgn0004378	Psf1 CG32318 Klp61F
DRSC25296	FBgn0022985 FBgn0266645	qkr58E-2 CR45152
DRSC22813	FBgn0022984 FBgn0034740 FBgn0034739	qkr58E-3 nsr CG3927
DRSC01221	FBgn0051864 FBgn0032393	Qtzl CG12264
DRSC11839	FBgn0086913 FBgn0267737	Rab26 CR46068
DRSC17662	FBgn0052671 FBgn0067052 FBgn0030221 FBgn0052673	Rab9Fa Rab9D Rab9Db Rab9E
DRSC17656	FBgn0052671 FBgn0067052 FBgn0030221 FBgn0052673	Rab9Fa Rab9D Rab9Db Rab9E
DRSC19853	FBgn0052671 FBgn0067052 FBgn0030221 FBgn0052673	Rab9Fa Rab9D Rab9Db Rab9E
DRSC18445	FBgn0052671 FBgn0067052 FBgn0052673 FBgn0030221	Rab9Fa Rab9D Rab9E Rab9Db
DRSC27303	FBgn0052671 FBgn0067052 FBgn0052673 FBgn0030221	Rab9Fa Rab9D Rab9E Rab9Db
DRSC00778	FBgn0026778 FBgn0085343	Rad1 Sws1
DRSC07671	FBgn0033389 FBgn0259728	Rad51C CG42382
DRSC07525	FBgn0053139 FBgn0263377	Ranbp11 CR43429
DRSC26142	FBgn0034585 FBgn0003748	Rbpn-5 Treh
DRSC00533	FBgn0260933 FBgn0031263	rempA Tspo
DRSC01997	FBgn0028700 FBgn0262647	RfC38 Nup160
DRSC18049	FBgn0266098 FBgn0029746	rg CG15465
DRSC26250	FBgn0266098 FBgn0029746	rg CG15465
DRSC18048	FBgn0266098 FBgn0029746	rg CG15465
DRSC17726	FBgn0266098 FBgn0029746	rg CG15465
DRSC22086	FBgn0266098 FBgn0029746	rg CG15465
DRSC29144	FBgn0266098 FBgn0029746	rg CG15465
DRSC18047	FBgn0266098 FBgn0029746	rg CG15465
DRSC07531	FBgn0023172 FBgn0266637	RhoGEF2 CR45144
DRSC22396	FBgn0083940 FBgn0266199	RhoU CR44894
DRSC17803	FBgn0083940 FBgn0266199	RhoU CR44894
DRSC25197	FBgn0083940 FBgn0266199	RhoU CR44894
DRSC14413	FBgn0039306 FBgn0266741	RIOK2 CR45214
DRSC40781	FBgn0263757 FBgn0263738	Rpb4 Ada2a
DRSC25025	FBgn0015288 FBgn0259993	RpL22 CR42491
DRSC26182	FBgn0035422 FBgn0086069	RpL28 snoRNA:Me28S-C3351
DRSC08293	FBgn0035422 FBgn0086068	RpL28 snoRNA:Or-CD12
DRSC16834	FBgn0020910 FBgn0051144	RpL3 CR31144
DRSC21053	FBgn0064225 FBgn0262887 FBgn0003256	RpL5 CR43242 rl
DRSC21099	FBgn0064225 FBgn0003256	RpL5 rl
DRSC39019	FBgn0032404 FBgn0085193	RpL7-like CG34164
DRSC02836	FBgn0032404 FBgn0085193	RpL7-like CG34164
DRSC02837	FBgn0032404 FBgn0085193	RpL7-like CG34164
DRSC28314	FBgn0032404 FBgn0085193	RpL7-like CG34164
DRSC18404	FBgn0029745 FBgn0000721	Rpn13R for
DRSC19467	FBgn0066304 FBgn0066303	Rpp20 CG33932
DRSC18710	FBgn0004403 FBgn0004404	RpS14a RpS14b
DRSC18711	FBgn0004403 FBgn0004404	RpS14a RpS14b
DRSC19831	FBgn0033555 FBgn0010198	RpS15Ab RpS15Aa
DRSC06129	FBgn0033555 FBgn0010198	RpS15Ab RpS15Aa
DRSC16433	FBgn0261599 FBgn0086663	RpS29 snoRNA:Psi18S-1275
DRSC10957	FBgn0034132 FBgn0052064	S-Lap8 S-Lap4
DRSC01188	FBgn0003313 FBgn0263087	sala CG43355
DRSC28864	FBgn0003313 FBgn0263087	sala CG43355
DRSC03605	FBgn0003313 FBgn0263087	sala CG43355
DRSC28079	FBgn0262714 FBgn0267984	Sap130 CR46251
DRSC29855	FBgn0266491 FBgn0266492	SclA SclB
DRSC22149	FBgn0266491 FBgn0266492	SclA SclB
DRSC39126	FBgn0266491 FBgn0266492	SclA SclB
DRSC25869	FBgn0030357 FBgn0052660 FBgn0262687 FBgn0052657	Sclp CR32660 CR43157 CR32657
DRSC22965	FBgn0030357 FBgn0052660 FBgn0262687 FBgn0052657	Sclp CR32660 CR43157 CR32657
DRSC41316	FBgn0037889 FBgn0037879 FBgn0037888	scpr-A scpr-C scpr-B
DRSC15200	FBgn0037879 FBgn0037888	scpr-C scpr-B
DRSC15737	FBgn0037879 FBgn0037888 FBgn0037889	scpr-C scpr-B scpr-A
DRSC26639	FBgn0037879 FBgn0037888 FBgn0037889	scpr-C scpr-B scpr-A
DRSC15715	FBgn0037879 FBgn0037888 FBgn0037889	scpr-C scpr-B scpr-A
DRSC13140	FBgn0003345 FBgn0267111	sd CR45551
DRSC21980	FBgn0030975 FBgn0264273 FBgn0034821 FBgn0004244 FBgn0265276 FBgn0265457 FBgn0012344 FBgn0029814 FBgn0020304 FBgn0260990 FBgn0004396 FBgn0046763 FBgn0266222 FBgn0267336	SdhBL Sema-2b CG9876 Rdl l(3)neo38 CR44357 Dh44 CG15765 drongo yata CrebA CG17278 CR44917 Glut4EF
DRSC16114	FBgn0037912 FBgn0037913	sea fabp
DRSC16115	FBgn0037912 FBgn0037913	sea fabp
DRSC28381	FBgn0003353 FBgn0028552	sei gammaSnap1
DRSC38987	FBgn0003353 FBgn0028552 FBgn0266721	sei gammaSnap1 gammaSnap2
DRSC20574	FBgn0011834 FBgn0031141	Ser6 CG1304
DRSC28384	FBgn0263006 FBgn0034931	SERCA CG2812
DRSC04319	FBgn0263006 FBgn0034931	SERCA CG2812
DRSC11999	FBgn0022764 FBgn0041605	Sin3A cpx
DRSC27472	FBgn0029783 FBgn0267076	Sirt4 CR45520
DRSC18290	FBgn0029783 FBgn0267076	Sirt4 CR45520
DRSC27126	FBgn0037810 FBgn0037811	sle CG12592
DRSC21387	FBgn0037810 FBgn0037811	sle CG12592
DRSC03143	FBgn0029161 FBgn0085208	slmo CG34179
DRSC38686	FBgn0029161 FBgn0085208 FBgn0031768	slmo CG34179 CG12393
DRSC25405	FBgn0086906 FBgn0028544	sls CG16884
DRSC07396	FBgn0083989 FBgn0033699	snoRNA:Me28S-C3420b RpS11
DRSC37902	FBgn0065046 FBgn0065047 FBgn0065048	snoRNA:U3:9B snoRNA:U3:54Ab snoRNA:U3:54Aa
DRSC37901	FBgn0004187 FBgn0004186 FBgn0004185 FBgn0003916 FBgn0004183	snRNA:U1:95Cc snRNA:U1:95Cb snRNA:U1:95Ca snRNA:U1:21D snRNA:U1:82Eb
DRSC13641	FBgn0004187 FBgn0004186 FBgn0004185 FBgn0003916 FBgn0004183	snRNA:U1:95Cc snRNA:U1:95Cb snRNA:U1:95Ca snRNA:U1:21D snRNA:U1:82Eb
DRSC37890	FBgn0004187 FBgn0004186 FBgn0004185 FBgn0004183 FBgn0003916	snRNA:U1:95Cc snRNA:U1:95Cb snRNA:U1:95Ca snRNA:U1:82Eb snRNA:U1:21D
DRSC09445	FBgn0024189 FBgn0283657 FBgn0266418 FBgn0026160 FBgn0263511 FBgn0263772 FBgn0267337 FBgn0264493 FBgn0003301 FBgn0052677 FBgn0263239 FBgn0003984 FBgn0038629 FBgn0029814 FBgn0263354 FBgn0259176 FBgn0263705 FBgn0259735 FBgn0045038 FBgn0031023 FBgn0263392 FBgn0083981 FBgn0029822 FBgn0021767 FBgn0003499 FBgn0014388 FBgn0029539 FBgn0039225 FBgn0265416 FBgn0040765 FBgn0259110 FBgn0264562	sns Tlk wake tna Vsx1 CG43689 rn rdx rut X11Lbeta dar1 vn CG14304 CG15765 CG42784 bun Myo10A CG42389 Proc CG14200 Tet RunxA CG12236 org-1 sr sty CG11663 Ets96B Neto luna mmd Hr4
DRSC16865	FBgn0022359 FBgn0266705	Sodh-2 CR45195
DRSC41541	FBgn0022359 FBgn0266705 FBgn0024289	Sodh-2 CR45195 Sodh-1
DRSC14417	FBgn0042630 FBgn0039633 FBgn0026160 FBgn0015618	Sox21b CG11873 tna Cdk8
DRSC21338	FBgn0020378 FBgn0020386	Sp1 Pdk1
DRSC07545	FBgn0034070 FBgn0000542	SP2353 ec
DRSC15929	FBgn0039141 FBgn0039140	spas Miro
DRSC14316	FBgn0040623 FBgn0039664	Spase12 CG2006
DRSC14102	FBgn0039172 FBgn0002863	Spase22-23 Acp95EF
DRSC16408	FBgn0037723 FBgn0266413	SpdS CR45053
DRSC22188	FBgn0052383 FBgn0052382	sphinx1 sphinx2
DRSC40870	FBgn0028986 FBgn0028987	Spn38F Spn28F
DRSC05009	FBgn0033112 FBgn0265058	Spn42Db CR44169
DRSC11793	FBgn0036969 FBgn0036970	Spn77Bb Spn77Bc
DRSC10689	FBgn0036969 FBgn0036970	Spn77Bb Spn77Bc
DRSC26069	FBgn0086532 FBgn0266635	Spt-I CR45142
DRSC16867	FBgn0003510 FBgn0003511	Sry-alpha Sry-beta
DRSC24321	FBgn0003510 FBgn0003511	Sry-alpha Sry-beta
DRSC16868	FBgn0003510 FBgn0003511	Sry-alpha Sry-beta
DRSC29189	FBgn0003510 FBgn0003511	Sry-alpha Sry-beta
DRSC11634	FBgn0037202 FBgn0267632	Ssl1 CR45970
DRSC14395	FBgn0041780 FBgn0266404	Ssl2 CR45044
DRSC21261	FBgn0053236 FBgn0053240 FBgn0053247 FBgn0053245 FBgn0053237 FBgn0053246 FBgn0053239 FBgn0053244 FBgn0053242 FBgn0044817 FBgn0053241 FBgn0053243 FBgn0053238 FBgn0259846 FBgn0259858 FBgn0259857 FBgn0259860 FBgn0259840 FBgn0267444 FBgn0267445 FBgn0259852 FBgn0000173 FBgn0033015	Ste:CG33236 Ste:CG33240 Ste:CG33247 Ste:CG33245 Ste:CG33237 Ste:CG33246 Ste:CG33239 Ste:CG33244 Ste:CG33242 Ste12DOR Ste:CG33241 Ste:CG33243 Ste:CG33238 Su(Ste):CR42415 Su(Ste):CR42427 Su(Ste):CR42426 Su(Ste):CR42429 Su(Ste):CR42409 Su(Ste):CR45794 Su(Ste):CR45795 Su(Ste):CR42421 ben d4
DRSC19004	FBgn0053242 FBgn0053241 FBgn0053240 FBgn0044817 FBgn0053247 FBgn0053236 FBgn0053245 FBgn0053237 FBgn0053246 FBgn0053238 FBgn0053243 FBgn0053239 FBgn0053244 FBgn0259817 FBgn0259858 FBgn0259857 FBgn0259840 FBgn0267444 FBgn0267445 FBgn0259864	Ste:CG33242 Ste:CG33241 Ste:CG33240 Ste12DOR Ste:CG33247 Ste:CG33236 Ste:CG33245 Ste:CG33237 Ste:CG33246 Ste:CG33238 Ste:CG33243 Ste:CG33239 Ste:CG33244 SteXh:CG42398 Su(Ste):CR42427 Su(Ste):CR42426 Su(Ste):CR42409 Su(Ste):CR45794 Su(Ste):CR45795 Su(Ste):CR42433
DRSC26515	FBgn0053242 FBgn0053241 FBgn0053240 FBgn0044817 FBgn0053247 FBgn0053236 FBgn0053245 FBgn0053237 FBgn0053246 FBgn0053238 FBgn0053243 FBgn0053239 FBgn0053244 FBgn0259817 FBgn0259858 FBgn0259857 FBgn0259840 FBgn0267444 FBgn0267445 FBgn0259864	Ste:CG33242 Ste:CG33241 Ste:CG33240 Ste12DOR Ste:CG33247 Ste:CG33236 Ste:CG33245 Ste:CG33237 Ste:CG33246 Ste:CG33238 Ste:CG33243 Ste:CG33239 Ste:CG33244 SteXh:CG42398 Su(Ste):CR42427 Su(Ste):CR42426 Su(Ste):CR42409 Su(Ste):CR45794 Su(Ste):CR45795 Su(Ste):CR42433
DRSC21260	FBgn0053242 FBgn0053241 FBgn0053240 FBgn0044817 FBgn0053247 FBgn0053245 FBgn0053236 FBgn0053237 FBgn0053246 FBgn0053243 FBgn0053238 FBgn0053239 FBgn0053244 FBgn0259817 FBgn0259858 FBgn0259857 FBgn0259840 FBgn0267444 FBgn0267445 FBgn0259864	Ste:CG33242 Ste:CG33241 Ste:CG33240 Ste12DOR Ste:CG33247 Ste:CG33245 Ste:CG33236 Ste:CG33237 Ste:CG33246 Ste:CG33243 Ste:CG33238 Ste:CG33239 Ste:CG33244 SteXh:CG42398 Su(Ste):CR42427 Su(Ste):CR42426 Su(Ste):CR42409 Su(Ste):CR45794 Su(Ste):CR45795 Su(Ste):CR42433
DRSC09834	FBgn0036336 FBgn0266994	ste14 CR45445
DRSC05639	FBgn0050462 FBgn0050461	ste24c CG30461
DRSC07316	FBgn0050462 FBgn0050461	ste24c CG30461
DRSC20473	FBgn0064123 FBgn0031159	stg1 CG11566
DRSC20483	FBgn0064123 FBgn0031159	stg1 CG11566
DRSC20482	FBgn0064123 FBgn0031159	stg1 CG11566
DRSC20481	FBgn0064123 FBgn0031159	stg1 CG11566
DRSC21112	FBgn0016975 FBgn0016976	stnB stnA
DRSC21113	FBgn0016975 FBgn0016976	stnB stnA
DRSC20969	FBgn0016975 FBgn0016976	stnB stnA
DRSC27837	FBgn0263755 FBgn0263740	Su(var)3-9 eIF-2gamma
DRSC10815	FBgn0036191 FBgn0267545	Sugb CR45885
DRSC17293	FBgn0004648 FBgn0266196	svr CR44891
DRSC18722	FBgn0264270 FBgn0263563	Sxl mir-4956
DRSC04659	FBgn0017482 FBgn0016053	T3dh pgc
DRSC12019	FBgn0026620 FBgn0283546	tacc mir-9384
DRSC12992	FBgn0259730 FBgn0259733 FBgn0259731 FBgn0259732	tal-1A tal-AA tal-2A tal-3A
DRSC29882	FBgn0031312 FBgn0264267	Tango14 CR43767
DRSC00667	FBgn0031312 FBgn0264267	Tango14 CR43767
DRSC27370	FBgn0260744 FBgn0037970	Tango9 GC2
DRSC14476	FBgn0260744 FBgn0037970	Tango9 GC2
DRSC15649	FBgn0037874 FBgn0039071 FBgn0039070	Tctp CG4434 CG17083
DRSC12788	FBgn0263392 FBgn0010825 FBgn0263511 FBgn0039808 FBgn0036179 FBgn0259211 FBgn0013263 FBgn0004854 FBgn0052532 FBgn0030412 FBgn0016694 FBgn0262593 FBgn0003117 FBgn0020307 FBgn0038934 FBgn0261698 FBgn0035713 FBgn0034795	Tet Gug Vsx1 CG12071 CG7368 grh Trl B-H2 CG32532 Tomosyn Pdp1 Shab pnr dve Gld2 CG42732 velo MED23
DRSC05297	FBgn0263392 FBgn0032129 FBgn0004595 FBgn0000014 FBgn0041092 FBgn0016754 FBgn0026160 FBgn0259735 FBgn0023076 FBgn0004511 FBgn0264308 FBgn0000542 FBgn0264894 FBgn0004647 FBgn0033497 FBgn0000448 FBgn0000233 FBgn0030505 FBgn0052548 FBgn0037698 FBgn0003345 FBgn0027339 FBgn0020307 FBgn0030340 FBgn0259211 FBgn0265523 FBgn0029822 FBgn0011676 FBgn0086680 FBgn0024250 FBgn0267001 FBgn0030077 FBgn0278608 FBg…	Tet jp pros abd-A tai sba tna CG42389 Clk dy CG43778 ec CG44085 N CG12912 Hr3 btd NFAT CG32548 CG16779 sd jim dve CG15740 grh Smr CG12236 Nos vvl brk Ten-a CG15365 Dsp1 Rbp6 rut
DRSC39152	FBgn0036263 FBgn0000594	thoc6 Est-P
DRSC11163	FBgn0036263 FBgn0000594	thoc6 Est-P
DRSC41492	FBgn0044811 FBgn0053117	TotF Victoria
DRSC25523	FBgn0035078 FBgn0035077	Tpc2 CG9083
DRSC04625	FBgn0035078 FBgn0035077	Tpc2 CG9083
DRSC41545	FBgn0010423 FBgn0010424	TpnC47D TpnC73F
DRSC07117	FBgn0033644 FBgn0050035	Tret1-2 Tret1-1
DRSC17775	FBgn0030049 FBgn0267914	Trf4-1 CR46195
DRSC10014	FBgn0013263 FBgn0053260	Trl CG33260
DRSC11032	FBgn0262516 FBgn0261361	Trpml CG42638
DRSC40772	FBgn0020653 FBgn0037170	Trxr-1 Trxr-2
DRSC03232	FBgn0032074 FBgn0267740	Tsp29Fa CR46071
DRSC28522	FBgn0032074 FBgn0267740	Tsp29Fa CR46071
DRSC06184	FBgn0033137 FBgn0033136	Tsp42Ep Tsp42Eo
DRSC14237	FBgn0039117 FBgn0039116	tst CG10375
DRSC02392	FBgn0031957 FBgn0040099	TwdlE lectin-28C
DRSC41505	FBgn0039437 FBgn0039436	TwdlL TwdlB
DRSC25071	FBgn0039437 FBgn0039436	TwdlL TwdlB
DRSC16050	FBgn0039437 FBgn0039436	TwdlL TwdlB
DRSC19565	FBgn0031038 FBgn0031039	Tyler Shawn
DRSC19564	FBgn0031038 FBgn0031039	Tyler Shawn
DRSC02665	FBgn0031758 FBgn0263442	Ucp4B CR43465
DRSC40575	FBgn0262124 FBgn0266632	uex CR45139
DRSC38981	FBgn0026314 FBgn0026315 FBgn0051002 FBgn0040253	Ugt35b Ugt35a CG31002 Ugt86Dg
DRSC01100	FBgn0063449 FBgn0063392 FBgn0063389	Uhg2 snoRNA:U14:30Ea snoRNA:Me18S-G1620
DRSC12749	FBgn0051352 FBgn0260463 FBgn0053105	Unc-115a Unc-115b p24-2
DRSC16502	FBgn0051352 FBgn0260463 FBgn0053105	Unc-115a Unc-115b p24-2
DRSC16492	FBgn0260463 FBgn0053105 FBgn0069242	Unc-115b p24-2 eca
DRSC38687	FBgn0260008 FBgn0050354	UQCR-11 UQCR-11L
DRSC13312	FBgn0270928 FBgn0000303	VAChT ChAT
DRSC38989	FBgn0028671 FBgn0028670 FBgn0028669	Vha100-1 Vha100-2 Vha100-3
DRSC10873	FBgn0028668 FBgn0267716	Vha16-2 CR46049
DRSC40775	FBgn0265262 FBgn0263598	Vha68-1 Vha68-2
DRSC14402	FBgn0046214 FBgn0265047	vig2 FDY
DRSC07277	FBgn0033748 FBgn0033749	vis achi
DRSC28600	FBgn0260964 FBgn0033848	Vmat CG13330
DRSC06365	FBgn0260964 FBgn0033848	Vmat CG13330
DRSC11909	FBgn0052350 FBgn0266657	Vps11 CR45164
DRSC15928	FBgn0010328 FBgn0264841	woc CR44049
DRSC15586	FBgn0260234 FBgn0038749	Xport-B Xport-A
DRSC01898	FBgn0041713 FBgn0001977	yellow-c CIAPIN1
DRSC10851	FBgn0036504 FBgn0262689	yellow-k CR43159
DRSC18731	FBgn0004045 FBgn0267161	Yp1 CR45601
DRSC39021	FBgn0033097 FBgn0033096	Zip42C.2 Zip42C.1
DRSC14405	FBgn0039282 FBgn0085788	Bili CR41504
DRSC03682	FBgn0051703 FBgn0051702 FBgn0051700	CG31703 CG31702 CR31700
DRSC09616	FBgn0052207 FBgn0052205	CR32207 CR32205
DRSC22544	FBgn0052511 FBgn0052821 FBgn0263209	CR32511 CR32821 CR43379
DRSC17442	FBgn0052745 FBgn0026015	CR32745 Top3beta
DRSC02653	FBgn0053318 FBgn0053317	CR33318 CR33317
DRSC01826	FBgn0053319 FBgn0010395	CR33319 Itgbn
DRSC18387	FBgn0085734 FBgn0052767	CR40450 CG32767
DRSC03702	FBgn0265613 FBgn0042701 FBgn0025814	CR44431 CR12628 Mgstl
DRSC18125	FBgn0052703 FBgn0030116	Erk7 CR17438
DRSC03760	FBgn0053808 FBgn0051615 FBgn0061209	His2A:CG33808 His-Psi:CR31615 His2B:CG17949
DRSC03757	FBgn0053906 FBgn0053904 FBgn0053902 FBgn0053900 FBgn0061209 FBgn0053910 FBgn0053890 FBgn0053880 FBgn0053882 FBgn0053894 FBgn0053876 FBgn0053884 FBgn0053892 FBgn0053874 FBgn0053886 FBgn0053898 FBgn0053872 FBgn0053888 FBgn0053896 FBgn0053870 FBgn0053868 FBgn0053908 FBgn0053878 FBgn0058461	His2B:CG33906 His2B:CG33904 His2B:CG33902 His2B:CG33900 His2B:CG17949 His2B:CG33910 His2B:CG33890 His2B:CG33880 His2B:CG33882 His2B:CG33894 His2B:CG33876 His2B:CG33884 His2B:CG33892 His2B:CG33874 His2B:CG33886 His2B:CG33898 His2B:CG33872 His2B:CG33888 His2B:CG33896 His2B:CG33870 His2B:CG33868 His2B:CG33908 His2B:CG33878 CR40461
DRSC21265	FBgn0053906 FBgn0053904 FBgn0053902 FBgn0053900 FBgn0053910 FBgn0061209 FBgn0053890 FBgn0053880 FBgn0053882 FBgn0053876 FBgn0053894 FBgn0053884 FBgn0053892 FBgn0053874 FBgn0053886 FBgn0053898 FBgn0053872 FBgn0053888 FBgn0053896 FBgn0053870 FBgn0053908 FBgn0053868 FBgn0053878 FBgn0058461	His2B:CG33906 His2B:CG33904 His2B:CG33902 His2B:CG33900 His2B:CG33910 His2B:CG17949 His2B:CG33890 His2B:CG33880 His2B:CG33882 His2B:CG33876 His2B:CG33894 His2B:CG33884 His2B:CG33892 His2B:CG33874 His2B:CG33886 His2B:CG33898 His2B:CG33872 His2B:CG33888 His2B:CG33896 His2B:CG33870 His2B:CG33908 His2B:CG33868 His2B:CG33878 CR40461
DRSC20357	FBgn0004227 FBgn0040045	nonA CR12460
